1                                   **Superior colliculus visual neural sensitivity at the lower**  
2                                   **limit of natural self-induced image displacements**

3  
4                                   Ziad M. Hafed<sup>1, 2</sup>, Chih-Yang Chen<sup>1, 2, 3</sup>, and Fatemeh Khademi<sup>1, 2</sup>

5  
6                                   1. Werner Reichardt Center for Integrative Neuroscience,  
7                                   University of Tübingen, Tübingen, Germany

8                                   2. Hertie Institute for Clinical Brain Research,  
9                                   University of Tübingen, Tübingen, Germany

10                                  3. Institute for the advanced study of Human biology (WPI-ASHBi), Kyoto University, Kyoto, Japan

11  
12  
13 **Correspondence to:**

14                                  Ziad M. Hafed

15                                  Werner Reichardt Center for Integrative Neuroscience

16                                  Otfried-Müller Str. 25

17                                  Tübingen, Germany, 72076

18                                  Tel: +49 7071 29 88819

19                                  Email: [ziad.m.hafed@cin.uni-tuebingen.de](mailto:ziad.m.hafed@cin.uni-tuebingen.de)

20

21

22

23 **Abstract**

24

25 Visual pattern analysis relies on computations from neurons possessing spatially confined  
26 receptive fields. Often, such receptive fields are orders of magnitude larger than the visual  
27 pattern components being processed, as well as these components' minute displacements  
28 on the retina, whether due to small object or self motions. Yet, perception effortlessly  
29 handles such visual conditions. Here, we show that in the primate superior colliculus, a brain  
30 structure long associated with oculomotor control, neurons with relatively large receptive  
31 fields are still sensitive to visual pattern displacements as small as 1 min arc. We used real-  
32 time gaze-contingent retinal image stabilization to control the instantaneous spatio-  
33 temporal luminance modulation of detailed patterns experienced by neurons, probing  
34 sensitivity to the lower limit of natural self-induced image displacements. Despite a large  
35 difference between pattern displacement amplitudes and receptive field sizes, collicular  
36 neurons were strongly sensitive to the visual pattern consequences of the smallest possible  
37 eye movements.

38

39

## 40 Introduction

41

42 Image analysis in the primate visual system is performed by neurons having individual  
43 receptive fields (RF's) sampling confined regions of the retinal image. Outside the fovea, and  
44 particularly in higher visual areas, RF's can be large. This is also the case in sensory-motor  
45 structures like the superior colliculus (SC) <sup>1-3</sup>, which itself has a rich and diverse visual  
46 repertoire <sup>1-7</sup>.

47

48 Integration of relatively large image regions by individual RF's raises questions about how  
49 detailed visual pattern analysis can occur when the local features inside an RF are much  
50 smaller than RF size. Among these questions is what nature of visual processing takes place  
51 in the SC, a sensory-motor structure, when compared to other visual areas that are more  
52 distant from the motor control apparatuses. For example, the SC contributes to saccade  
53 generation <sup>8</sup>, and its diverse visual properties seem to be optimized for detecting stimuli for  
54 the purpose of gaze orienting <sup>9</sup>. Does this mean that SC neurons are incapable of detailed  
55 visual pattern analysis that may be more the purview of visual cortex?

56

57 We investigated this question by exploring whether SC neurons are sensitive to the visual  
58 pattern consequences of minute image displacements over their RF's. With the head fixed, a  
59 lower limit on natural self-induced retinal image motion is that caused by slow ocular  
60 position drifts during gaze fixation (Fig. 1A) <sup>10-12</sup>. With stable external stimuli, such drifts  
61 introduce image pattern displacements over individual RF's that are much smaller than the  
62 RF's themselves (Fig. 1B). Thus, the local pattern features of the stimuli never really leave  
63 the RF's during drifts. Yet, theoretical and perceptual work suggests that small  
64 displacements associated with ocular position drifts reformat images in meaningful ways for  
65 perception <sup>13-16</sup>. The reformatting itself is a direct consequence of eyeball rotation: it is a  
66 property of the image formation process. However, for the reformatting to be effective for  
67 perception, downstream neural processing stages need to be also sensitive to them.  
68 Therefore, we asked whether SC neurons functionally utilize the visual reformatting afforded  
69 by ocular position drifts in their activity (Fig. 1B).

70

71 We employed the technique of gaze-contingent retinal image stabilization, combined with  
72 grating images of different properties, to identify a direct SC neural correlate of perceptual  
73 effects <sup>13</sup> associated with ocular position drifts. We presented gratings to the RF's of SC  
74 neurons either stably on the display (and thus moving on the retina due to drifts) or using  
75 gaze-contingent display updates, as was done earlier in the primary visual cortex with simple  
76 spot and bar stimuli <sup>17</sup>. We used, instead, patterned gratings and different experimental  
77 manipulations of retinal image motions to demonstrate clear SC neural sensitivity (even  
78 extrafoveally) to the diminutive visual pattern consequences of ocular position drifts. These  
79 results complement studies in the retina highlighting the impact of visual reformatting by  
80 drifts on the retinal output <sup>18</sup>, and they demonstrate that SC neurons can contribute to visual  
81 scene analysis with high fidelity despite their relatively large RF's.

82

83

84

85

86

87

## 88 Results

89

90 We asked whether visually-responsive SC neurons are sensitive to image pattern  
 91 displacements at the lower limit of natural self-induced motion. We did so by recording SC  
 92 neural activity from head-fixed monkeys precisely holding their gaze on a small, stable  
 93 fixation spot of 8.5 x 8.5 min arc dimensions. During fixation, the eyes drifted slowly<sup>10-12</sup>,  
 94 causing retinal image displacements on the order of 1 min arc magnitude (Fig. 1A), with  
 95 occasional larger microsaccades. The scale of retinal image displacements associated with  
 96 ocular position drifts, as small as the approximate distance between two individual foveal  
 97 cone photoreceptors, is considerably smaller than SC RF sizes, especially extrafoveally<sup>1-3,9</sup>. It  
 98 is also frequently much smaller than the viewed image patterns themselves. Consider, for  
 99 example, a gabor grating of 4.44 cycles/deg (cpd) in an RF of a neuron preferring 3.5 deg  
 100 eccentricity. A displacement over the RF of the grating's retinal image by 1 min arc would  
 101 cause minimal change to the overall luminance pattern experienced by the neuron (Fig. 1B).  
 102 Yet, theoretical considerations suggest that such minute pattern displacements can still  
 103 matter for perception<sup>10,13-16</sup>. We, therefore, investigated whether SC neurons are sensitive  
 104 to these diminutive pattern displacements.

105

106

107

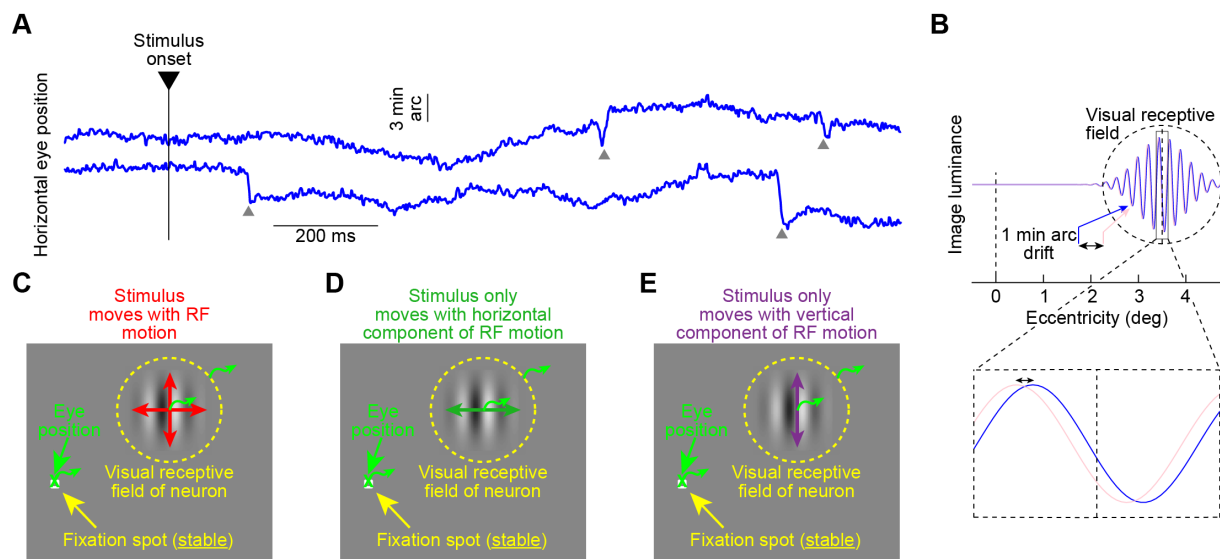

108

109

110 **Figure 1 Isolating the visual-pattern consequences of slow eye position drifts on SC neural activity. (A)**

111 Horizontal eye position from two example gaze fixation trials. Microsaccades are highlighted with arrows and

112 were removed from all analyses (Methods). In between, slow eye position drifts occurred with a retinal-image

113 displacement range on the order of 1-3 min arc. (B) The luminance profile of a 4.44 cpd gabor grating placed

114 within a visual receptive field (RF) of a hypothetical SC neuron for two instantaneous eye positions separated by

115 1 min arc (blue versus pink; the bottom inset magnifies one cycle). The image displacement is much smaller than

116 the RF size (depicted based on our prior measurements<sup>3,9</sup>). (C) To characterize SC neural sensitivity to pattern

117 displacements on the order of 1-3 min arc, we exploited the slow position drifts in A. Monkeys fixated a stable

118 spot, and we continuously translated the image of an eccentric grating with fixational eye motion, thus stabilizing

119 the grating's image within the continuously moving retinotopic RF. This minimized the displacements of the

120 grating in the RF that would have otherwise occurred. (D) In other conditions, we only stabilized the horizontal

121 component of ocular position changes (minimizing RF image shifts orthogonal to the grating). (E) In yet other

122 conditions, we only stabilized the vertical component of eye drift. Curly bright green arrows in C, D, E schematize

123 the eye position changes and their associated retinotopic RF motions.

124

125  
126  
127  
128  
129  
130  
131  
132  
133  
134  
135  
136  
137  
138  
139  
140  
141  
142  
143  
144  
145  
146  
147  
148  
149  
150  
151  
152  
153  
154  
155  
156  
157  
158  
159  
160  
161  
162  
163  
164  
165  
166  
167  
168  
169  
170  
171

We utilized real-time retinal image stabilization to move a visual pattern (gabor grating) in lock with instantaneous eye position (Methods). We compared neural activity with a stable pattern on the display (thus moving with respect to a continuously moving retinotopic RF) to neural activity with a moving pattern on the display tracking the eye movements (and thus rendered more stable with respect to the RF; Fig. 1C). If the SC is sensitive to visual pattern consequences of retinal image displacements as small as those in Fig. 1A, B, then the neural responses should differ between the two conditions. Critically, the fixation spot was always stable on the display, allowing the monkeys to properly anchor their gaze independently of retinal image stabilization. Indeed, the characteristics of both ocular position drifts and microsaccades across all of our gaze-contingent manipulations (Methods) were unaltered by whether the grating was stable on the display (control) or not (Figs. S1-S3). This is consistent with evidence that, in steady-state fixation, microsaccades and ocular position drifts act to optimize eye position at the fixated target<sup>19-22</sup>. Therefore, we experimentally controlled the subtle image displacements of visual patterns over RF's (Fig. 1), but without altering the natural gaze behavior itself.

### *Superior colliculus neurons are sensitive to visual pattern displacements on the order of 1 min arc*

We first established the effectiveness of our manipulation. After identifying a visually-responsive neuron, we estimated its retinotopic RF hotspot location and extent (Methods). If we then pegged the stimulus, via retinal image stabilization, at the estimated hotspot location, then the neuron would consistently experience an optimal stimulus. This is in contrast to control trials, during which fixational eye movements could, at any one moment in time, displace the stimulus from the optimal RF hotspot location or otherwise blur it. Thus, neural activity was expected to be elevated with retinal image stabilization (Fig. 2). Alternatively, if we pegged the stimulus at a sub-optimal location relative to the RF during retinal image stabilization, then the neuron's activity was expected to decrease, because in control trials, eye movements could momentarily bring the stimulus to a more optimal RF position (Fig. S4). These effects are similar to those observed in V1 with the retinal image stabilization technique and simple spot and bar stimuli<sup>17,23,24</sup>, and they meant that we were now in a good position to explore, in more detail, the visual pattern consequences of minute ocular position drifts on SC image representations.

In all of our subsequent analyses, we only focused on situations like in Fig. 2, with an optimally placed RF stimulus, and also with primarily extrafoveal neurons with RF's larger than the scale of ocular position drifts; this was the relevant scenario for the questions raised by Fig. 1B. We also excluded all epochs around microsaccades (Methods), because retinal image stabilization with discretized display update times (Methods) is expectedly<sup>17</sup> least effective for these faster eye movements (but see Fig. S5 for evidence of the effectiveness of the technique in tracking eye motions even with microsaccades).

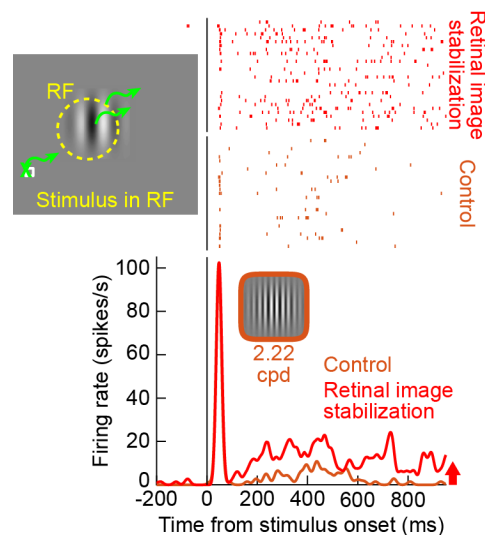

172  
173

174 **Figure 2 Example SC neuron illustrating the effect of retinal image stabilization on SC activity.** In control trials,  
175 we presented a grating of middle spatial frequency (2.22 cpd) near RF center. The neuron had a weak response  
176 after the initial visual burst. In retinal image stabilization trials, we continuously updated the position of the  
177 grating with fixational eye position (predominantly ocular drift; Fig. 1A), to render the grating's retinotopic  
178 position relative to the RF more stable than in control trials. The neuron's sustained visual response was  
179 significantly elevated, suggesting that smearing of the grating position over the RF in control trials reduced the  
180 overall responsiveness of the neuron. Our analyses focused on sustained responses, to avoid the transients  
181 associated with stimulus onsets at the beginnings of trials (Methods). Fig. S4 also shows an additional validation  
182 of the stabilization technique, this time when placing the grating away from the RF center of a recorded neuron.

183  
184  
185  
186

187 Retinal image stabilization of a stimulus at the RF hotspot location consistently elevated SC  
188 neural activity, suggesting sensitivity to local image pattern statistics within the RF's (like  
189 those schematized in Fig. 1B). In Fig. 3A, we plotted the normalized population activity after  
190 the onset of a 4.44 cpd grating in the RF's, either in control or with full retinal image  
191 stabilization. We found a persistently elevated sustained response (after an initial visual  
192 burst due to stimulus onset) for as long as the stimulus was stabilized over the RF's (compare  
193 control to retinal image stabilization firing rates). Given the spatial scale of our image  
194 displacements associated with ocular position drifts and the predicted luminance  
195 modulations that they introduced (Figs. 1A, S1, S3C-F), this implies that SC neurons can  
196 indeed detect minute image pattern displacements much smaller than RF sizes, and also  
197 smaller than the pattern features themselves (Fig. 1B). Figure 3B also shows the distribution  
198 of individual neural modulation indices (Methods) across our population, with a significant  
199 positive shift indicating consistently elevated firing rates during retinal image stabilization  
200 (21.74% average modulation index relative to control;  $p=3.2073 \times 10^{-8}$ ; 1-sample t-test;  $n=61$   
201 neurons). Moreover, Fig. S6A shows the individual neuron raw firing rates during sustained  
202 fixation (shaded gray region on the x-axis of Fig. 3A, and excluding microsaccades) in the two  
203 conditions: practically all neurons exhibited elevated activity for vertical 4.44 cpd gratings  
204 stabilized over their RF's as opposed to being jittered by ocular position drifts in the control  
205 condition. This is a direct SC neural correlate of the concept of temporal encoding by ocular  
206 position drifts predicted theoretically<sup>13-15</sup>, but now being viewed from the individual neuron  
207 perspective.

208

209  
210  
211  
212

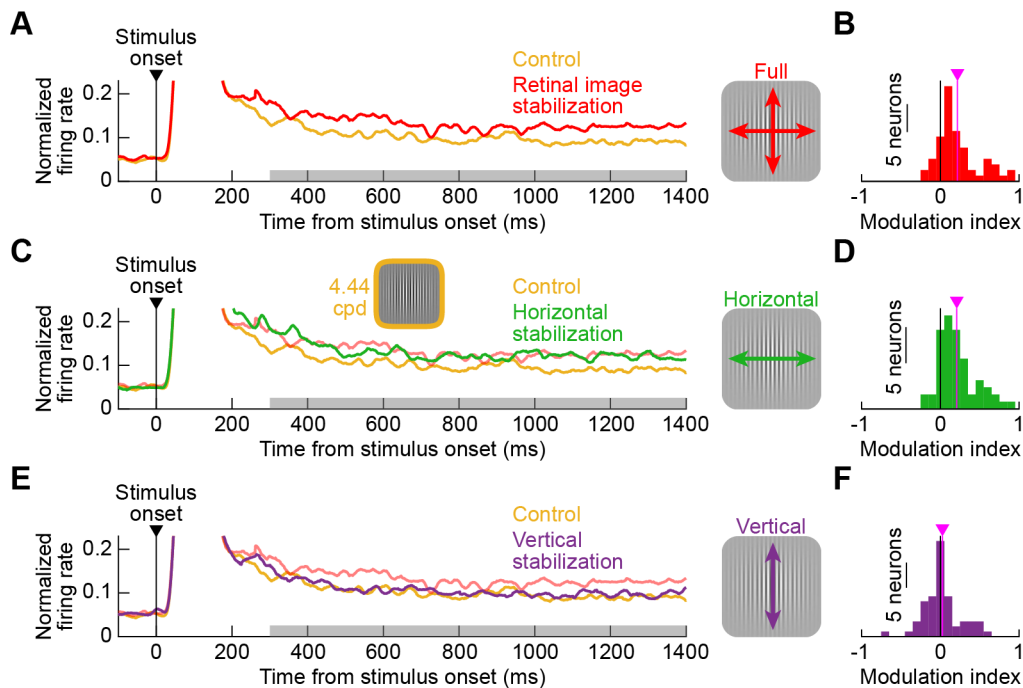

213  
214

**Figure 3 SC neurons are sensitive to image pattern displacements as small as 1-3 min arc in amplitude. (A)** Normalized firing rate across our population after the onset of a 4.44 cpd grating in the RF's. Yellow shows the control condition in which the grating was stable on the display, and therefore continuously being displaced over the retinotopic RF's. The neurons exhibited a sustained response above baseline, as long as there was a stimulus presented. Red shows the full retinal image stabilization condition (Fig. 1C), in which the firing rate was persistently elevated. The gray horizontal bar on the x-axis defines our measurement interval for our analyses (Methods). **(B)** Distribution of per-neuron modulation indices comparing the sustained response under full retinal image stabilization to the sustained response in control (Methods). The vertical pink line shows the mean modulation index across the population (individual neuron raw measurements are also shown in Fig. S6A). **(C)** Same as **A** but for retinal image stabilization of only the horizontal component of eye position displacements (orthogonal to the grating orientation). The neurons were as affected as in the full retinal image stabilization condition (the faint red curve is replicated from **A** for easier comparison). This is because a vertical ocular position drift over a vertical grating causes no luminance modulations over the RF's beyond the original image pattern. **(D)** Modulation index distribution for the data in **C**, showing similar effects to full retinal image stabilization. **(E)** With vertical retinal image stabilization, the neurons were unaffected by the gaze-contingent image manipulation: the horizontal component of RF motion relative to the grating was the same as in control, resulting in the same neural response. **(F)** Modulation indices for vertical retinal image stabilization were not significantly different from zero across the population.

233  
234  
235

### *Drift-scale pattern displacements orthogonal to the patterns' orientations drive neural modulations the most*

The results of Fig. 3A, B might have been an artifact of world-centered grating motion, which was necessarily introduced by retinal image stabilization (by stabilizing the retinal image, we had to move the stimulus on the display). We, therefore, tested the stronger predictions afforded by either horizontal or vertical retinal image stabilization (Fig. 1D, E). Here, with the same vertical 4.44 cpd grating, if we stabilized only the horizontal component of fixational



243 eye movements, then any residual vertical movements of the grating over the retinotopic  
244 RF's (uncompensated by the partial gaze-contingent technique) would not alter the  
245 luminance pattern over the RF's too much; this is because the vertical component of ocular  
246 position drifts is much smaller than the grating size and also parallel to it (Fig. 1D). On the  
247 other hand, if we stabilized only the vertical component of fixational eye movements (Fig.  
248 1E), then the residual (uncompensated) horizontal movements of the grating over the  
249 retinotopic RF's would cause luminance pattern changes like in Fig. 1B. More importantly,  
250 since the ocular position drift statistics were unchanged across all of our manipulations (Fig.  
251 S1, S3C-F), the residual horizontal motions experienced by the neurons would be highly  
252 similar to those in the control condition, as if there was no retinal image stabilization at all.  
253 Thus, at the individual neural modulation level, horizontal retinal image stabilization should  
254 look indistinguishable from full retinal image stabilization relative to the control condition,  
255 and vertical retinal image stabilization should appear like the control condition instead; this  
256 is despite both conditions causing world-centered grating motions on the display.

257  
258 Our neurons were modulated according to the predictions of retinotopic pattern  
259 displacements over the RF's (Fig. 1B-E), suggesting sensitivity to local features much smaller  
260 than SC RF size. During horizontal retinal image stabilization, the neurons' activity was  
261 elevated as much as in full retinal image stabilization (Fig. 3C, D; average modulation index  
262 20.86%; significantly larger than zero;  $p=7.8757 \times 10^{-9}$ ; 1-sample t-test;  $n=61$  neurons). On the  
263 other hand, the neurons' firing rates were unchanged from control with vertical retinal  
264 image stabilization (Fig. 3E, F; population modulation index not significantly different from  
265 zero;  $p=0.3898$ ; 1-sample t-test;  $n=61$  neurons). The difference between horizontal and  
266 vertical retinal image stabilization was also robustly evident at the individual neuron level  
267 (Fig. S6B), and the spiking statistics in the two conditions mimicked those in either full retinal  
268 image stabilization (for the case of horizontal stabilization; Fig. S6C) or control (for the case  
269 of vertical stabilization; Fig. S6C). Therefore, SC neurons are sensitive to the image pattern  
270 displacements associated with ocular position drifts, despite the small scale of such drifts  
271 (and the local image features) relative to RF size. This means that SC neurons with relatively  
272 large RF's can benefit from the edge enhancing properties of ocular position drifts seen  
273 perceptually<sup>13</sup>.

274  
275 To further demonstrate the sensitivity of SC neurons to minute pattern displacements  
276 orthogonal to the local edges in the patterns, we also repeated the same experiments in one  
277 monkey but with horizontal, rather than vertical, 4.44 cpd gratings. Thus, in this monkey, we  
278 could test some neurons under two different pattern conditions within the same session  
279 (Methods). With vertical gratings, we replicated the results of Fig. 3, as seen in Fig. 4A, B.  
280 With horizontal gratings (Fig. 4C, D), it was now vertical retinal image stabilization (as well as  
281 full stabilization) that resulted in the largest neural modulations; horizontal stabilization  
282 (parallel to the now horizontal gratings) caused the least modulations (also see Fig. S7  
283 showing individual neuron firing rates as well as spiking statistics in the different conditions).  
284 Thus, it was always ocular position drifts orthogonal to the local pattern orientations that  
285 resulted in the largest neural modulations.

286  
287 Therefore, not only are SC neurons sensitive to image pattern displacements on the order of  
288 magnitude of 1 min arc, but they are also differentially sensitive as a function of the relative  
289 difference between the image displacement directions and the underlying pattern  
290 orientations. We previously demonstrated this to be the case in the SC for the image



291 displacements associated with significantly larger microsaccades<sup>25</sup>, but the smaller scale of  
 292 ocular position drifts (Fig. 1A, B) suggests an even finer ability of SC neurons to represent  
 293 and react to detailed visual patterns (Fig. 1B). The SC can indeed contribute to the  
 294 theoretically-predicted perceptual effects associated with slow ocular position drifts (e.g.  
 295 13,15).

296  
 297  
 298

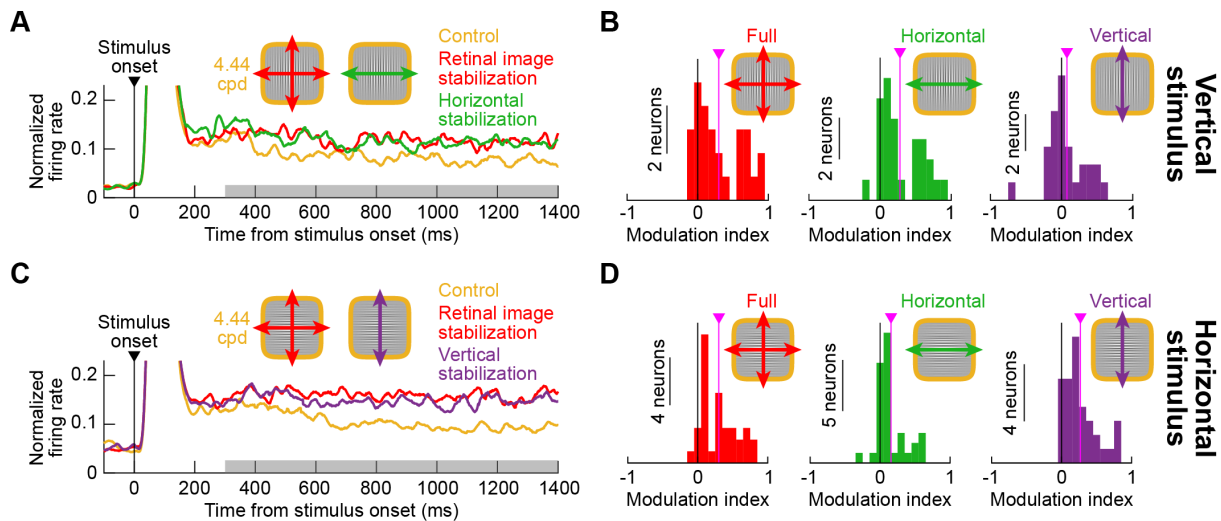

299  
 300

301 **Figure 4 Ocular position drifts orthogonal to a pattern cause the biggest neural modulations, independent of**  
 302 **original pattern orientation.** (A, B) Neural modulations similar to Fig. 3 from a monkey viewing a vertical 4.44  
 303 cpd grating. Full and horizontal (orthogonal to the grating orientation) retinal image stabilization caused the  
 304 biggest neural effects. The modulation indices for vertical retinal image stabilization (rightmost histogram in B)  
 305 were not significantly different from zero ( $p=0.1728$ ; 1-sample t-test;  $n=27$ ); the indices were significant for full  
 306 ( $p=6.741 \times 10^{-5}$ ) and horizontal ( $p=3.854 \times 10^{-5}$ ) stabilization (left and middle histograms in B). (C, D) SC neural  
 307 activity modulations in the same monkey viewing a horizontal grating instead of a vertical one. Now, horizontal  
 308 retinal image stabilization had the weakest effect (middle histogram in D; 15.56% modulation;  $p=1.1 \times 10^{-4}$ ; 1-  
 309 sample t-test;  $n=35$ ). Vertical retinal image stabilization resulted in similar neural modulations to full retinal  
 310 image stabilization (26.84% and 30.14%, respectively, in the rightmost and leftmost histograms in D; both  
 311 significantly different from zero:  $p=1.1 \times 10^{-7}$  and  $4.1 \times 10^{-8}$ ). All other conventions similar to Fig. 3. Also see Fig. S7  
 312 for individual neuron results.

313  
 314  
 315  
 316

### 317 *Neural responses to high spatial frequency patterns are modulated the most by* 318 *drift-scale image displacements*

319 The results so far suggest that SC neurons are sensitive to image pattern features that can be  
 320 significantly smaller than the neurons' RF sizes (Fig. 1B). However, with a pattern at the  
 321 optimal RF location, the scale of luminance modulations caused by ocular position drifts (Fig.  
 322 1B) should depend on both the spatial detail of the pattern itself as well as the spatial scale  
 323 of the retinal image displacements caused by eye movements (Fig. S3A, B). Therefore, given  
 324 the ocular position drift sizes that we observed (Figs. 1A, S1, S3C-F), we expected to observe  
 325 the largest effects of retinal image stabilization with high spatial frequency patterns (Fig.  
 326 S3A, B). This was indeed the case. In our experiments, we also tested low (0.56 cpd) and  
 327 intermediate (2.22 cpd) spatial frequency gratings (Methods). For both vertical (Fig. 5) and  
 328 horizontal (Fig. S8) gratings, the relevant orthogonal stabilization condition (horizontal in Fig.

329 5 and vertical in Fig. S8) resulted in the largest neural modulation indices for 4.44 cpd  
330 gratings. For example, with vertical gratings and horizontal stabilization, the average  
331 modulation index with 4.44 cpd was 20.86% relative to control, but it was 12.46% for 0.56  
332 cpd ( $p=0.0319$ ; 2-sample t-test;  $n=61$  neurons; comparing 4.44 cpd to 0.56 cpd; Fig. 5B); the  
333 modulation index was 13.27% for 2.22 cpd ( $p=0.0997$ ; 2-sample t-test;  $n=61$  neurons;  
334 comparing 4.44 cpd to 2.22 cpd; Fig. 5C). Naturally, full retinal image stabilization also  
335 showed similar effects to orthogonal image stabilization, as expected from Figs. 3, 4.  
336 Therefore, SC neurons are lawfully sensitive to the luminance modulations caused by  
337 orthogonal edges being displaced ever so slightly within their RF's due to ocular position  
338 drifts.

339  
340  
341

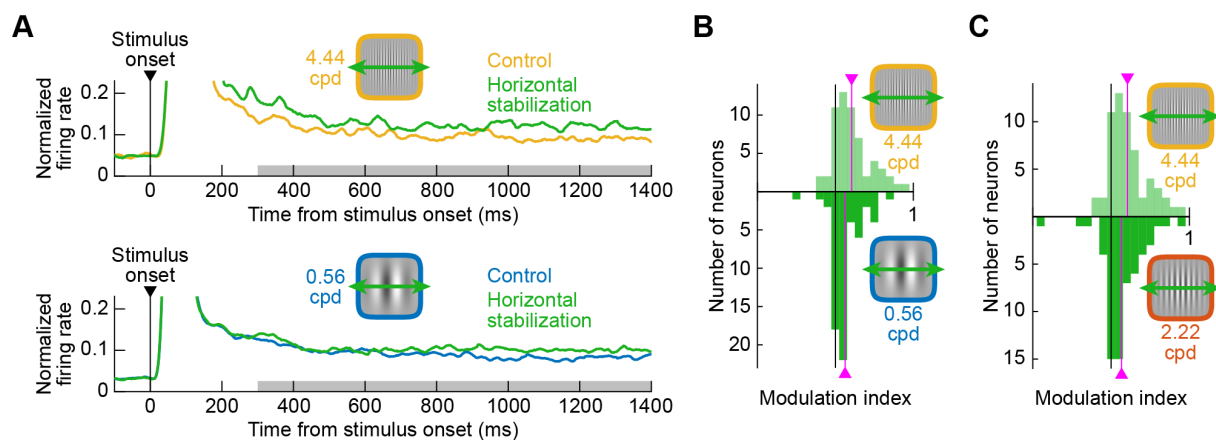

342  
343

344 **Figure 5 The representation of high spatial frequency features in the SC is most sensitive to the smallest**  
345 **naturally-induced image displacements. (A)** Normalized population firing rates in control and with horizontal  
346 retinal image stabilization for 4.44 cpd (top) and 0.56 cpd (bottom) vertical gratings. The high spatial frequency  
347 grating was associated with a larger neural modulation than the low spatial frequency grating (consistent with  
348 the image luminance predictions of Fig. S3A, B). **(B)** Neural modulation indices comparing high (top) and low  
349 (bottom) spatial frequencies with horizontal retinal image stabilization (pink vertical lines indicate the mean  
350 across the population). The high spatial frequency grating was associated with higher modulation indices. **(C)**  
351 When comparing the high to the middle spatial frequency, the difference in modulation indices was smaller than  
352 in **B** (but the modulation indices with 4.44 cpd were still higher than with 2.22 cpd; 20.86% versus 13.27%).

353

354

355

356 *Sensitivity to drift-scale pattern displacements still occurs in extrafoveal and*  
357 *lower visual field neurons with larger receptive fields*

358 In prior theoretical and perceptual work<sup>13,15</sup>, the image pattern consequences of ocular  
359 position drifts were primarily, and understandably, considered from a foveal perspective.  
360 However, our results above suggest that even eccentricities with larger RF's (Fig. 1B) may  
361 still utilize the visual formatting afforded by slow fixational eye movements in SC visual  
362 neural coding. Therefore, we exploited the fact that we sampled neurons from a wide range  
363 of eccentricities (Fig. S9), and we specifically analyzed extrafoveal neurons to ask if they  
364 were still sensitive to our retinal image stabilization manipulations. These extrafoveal SC  
365 neurons clearly showed modulations (Fig. 6A) that were very similar to those observed for  
366 the entire neural population (Figs. 3-5): greater elevation with retinal image stabilization for  
367 high than low spatial frequencies.

368  
369  
370  
371  
372  
373  
374  
375  
376  
377  
378  
379  
380  
381  
382  
383  
384  
385  
386  
387  
388

We then separated the neurons into 3 groups based on their preferred eccentricities (<1 deg, 1-3 deg, and >3 deg). In all cases, full and horizontal retinal image stabilization (with vertical gratings) had higher positive neural modulation indices than vertical retinal image stabilization (Fig. 6B). Specifically, the full and horizontal retinal image stabilization modulation indices in Fig. 6B were statistically significantly different from zero ( $p < 0.0026$  in each panel; 1-sample t-test; neuron numbers shown in Fig. 6B), but the vertical retinal image stabilization modulation indices were not. Moreover, the modulation indices were higher for high rather than low spatial frequencies (Fig. 6C); each comparison of high (4.44 cpd) to low (0.56 cpd) spatial frequency modulation indices in Fig. 6C was statistically significant ( $p < 0.032$  in each panel; 2-sample t-test; neuron numbers shown in Fig. 6C), except for >3 deg eccentricities (which still showed the same trends;  $p = 0.1683$ ). Thus, even extrafoveal SC neurons with larger RF's are sensitive to the visual pattern consequences of ocular position drifts on the order of magnitude of 1 min arc, and with the same dependencies as in Figs. 3-5. It should also be noted that the effect sizes of retinal image stabilization were smaller with the larger RF's (e.g. compare modulation indices across the three rows in Fig. 6B, C), which might be due to the larger integration areas of the larger RF's in the periphery.

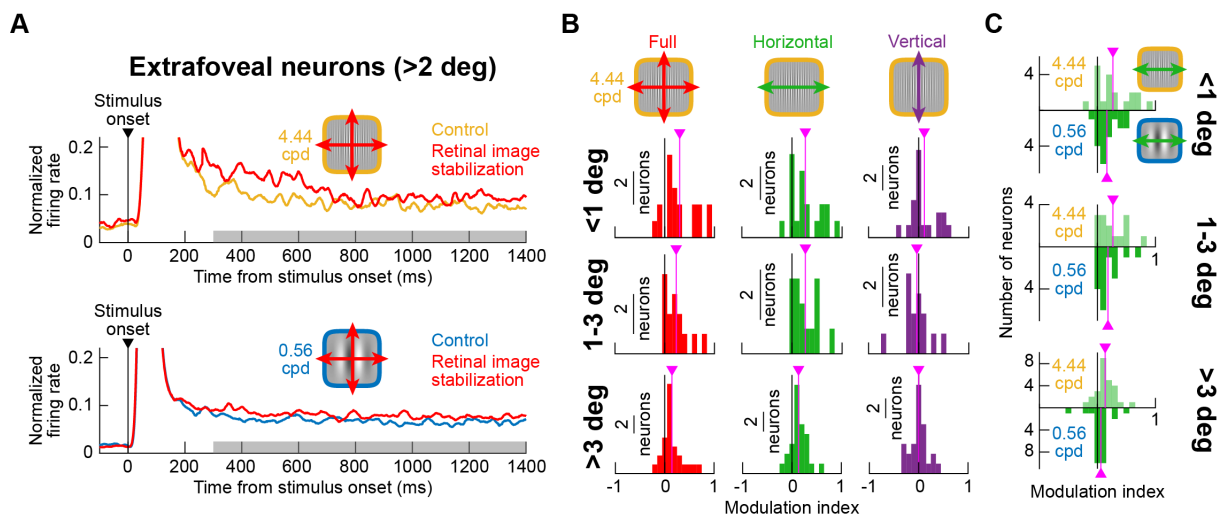

389  
390  
391  
392  
393  
394  
395  
396  
397  
398  
399  
400  
401  
402  
403  
404

**Figure 6 Visual formatting of SC neural responses by ocular position drifts persists for extra-foveal neurons with larger RF's.** (A) Normalized population firing rates from all extra-foveal SC neurons comparing control and retinal image stabilization conditions for high (top) and low (bottom) spatial frequencies. Similar observations to Figs. 3-5 could be made: there was still an effect of retinal image stabilization despite the larger RF's of extra-foveal SC neurons (see also Fig. 1B). (B) Modulation indices as in Figs. 3, 4 for three different groups of neurons according to their preferred eccentricities. Full and horizontal retinal image stabilization had positive modulation indices across eccentricities, whereas vertical retinal image stabilization modulation indices were always closest to zero. Note also that the modulation indices for full and horizontal retinal image stabilization progressively decreased in amplitude with increasing eccentricities (top to bottom). (C) Modulation indices comparing high and low spatial frequencies (as in Fig. 5) across the different groups of neurons. The same observations as in Fig. 5 were still made for extra-foveal SC neurons.

405 Another test of the effects of RF sizes in our retinal image stabilization manipulations was to  
406 also check upper and lower visual field SC neurons. This is so because, in the very same  
407 animals, we previously documented a substantial difference in SC RF sizes above and below  
408 the horizontal meridian, with lower visual field RF's being significantly larger<sup>9</sup>. Here, we  
409 found that even such lower visual field neurons, with significantly larger RF's than upper  
410 visual field neurons<sup>9</sup>, still showed all the same hallmarks of neural modulations described  
411 above (Figs. S10, S11). Thus, visual reformatting of the SC neural code by slow ocular  
412 position drifts extends well beyond the fovea and affects extrafoveal and lower visual field  
413 neurons with larger RF's (Fig. 1B).

414  
415

### 416 *Neural modulatory effects of ocular position drifts still occur without* 417 *experimental retinal image stabilization*

418 Finally, if SC neurons are indeed sensitive to the visual pattern consequences of ocular  
419 position drifts, might it be possible to observe hallmarks of this even without retinal image  
420 stabilization? To test this, we inspected our control trials in more detail. Since we did not  
421 have experimental control over individual retinal image stimulation in this condition, we  
422 picked, instead, microsaccade-free fixation epochs that were confined within a small eye  
423 position window ( $\pm 3$  min arc) in any given trial. We hypothesized that, with a vertical  
424 grating, momentary epochs of microsaccade-free fixation with particularly large horizontal  
425 eye position deviation within such a confined spatial window might drive a luminance  
426 transient signal from the neurons more than epochs of low horizontal deviation (a kind of  
427 momentary refreshing due to image translation, like with microsaccades<sup>25</sup> but on the much  
428 smaller scale of ocular position drifts). For example, in Fig. 7A, we had two 250-ms  
429 microsaccade-free epochs, with the left one showing a high deviation in horizontal eye  
430 position during the first 200 ms and the right one showing a low deviation (Fig. 7B shows the  
431 vertical eye position deviations from the same epochs). If we now measured neural activity  
432 in the final 50 ms, assuming a temporal integration window of approximately 100-200 ms as  
433 per prior measurements of the SC<sup>26</sup>, then we might expect that the recent history of  
434 luminance changes over the RF (in the past 200 ms) provides stronger sensory motion drive  
435 from the large horizontal deviation epochs than the low horizontal deviation epochs (or any  
436 vertical deviation epochs). In other words, refreshing of the image pattern representation in  
437 the RF would be the largest (for a given retinal image position) with an orthogonal recent  
438 shift of the pattern.

439

440 This was indeed the case. We divided all 250-ms microsaccade-free epochs, only from  
441 control trials, into high or low horizontal deviation (while still maintaining the average  
442 position of the retinal image of the grating within a confined spatial window; Methods),  
443 according to the median deviation value in each session. With a vertical grating of 4.44 cpd,  
444 the epochs with high horizontal deviation consistently resulted in higher firing rates in the  
445 final 50 ms than the epochs with low horizontal deviation (Fig. 7C;  $p=1.2 \times 10^{-4}$ ; 2-sample t-  
446 test;  $n=61$  neurons). When we repeated the same analysis based on epochs of large or small  
447 vertical eye position deviations instead, there was no longer a difference (Fig. 7D;  $p=0.1688$ ;  
448 2-sample t-test;  $n=61$ ). This is because vertical drift over a vertical grating caused minimal  
449 image changes in the RF's, and it is consistent with our horizontal and vertical retinal image  
450 stabilization results above (e.g. Figs. 3, 4). Similarly, with low, rather than high, spatial  
451 frequency patterns, the effects were significantly diminished (Fig. 7E, F;  $p=0.445$  for E and  
452  $p=0.8227$  for F; 2-sample t-test;  $n=61$  neurons), consistent with Fig. 5. Therefore, SC neurons

453 are sensitive to the visual pattern consequences of ocular position drifts even without any  
 454 physical stimulus motion on the display caused by our retinal image stabilization technique.  
 455  
 456  
 457

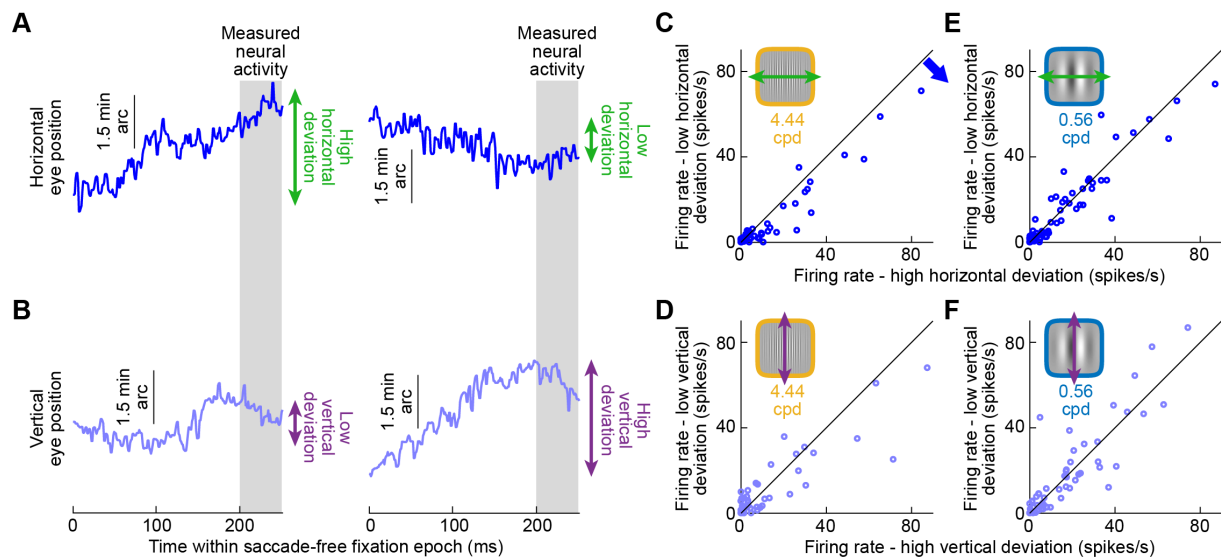

458  
 459  
 460 **Figure 7 Naturally occurring ocular position drifts in the absence of experimental retinal image stabilization**  
 461 **also significantly modulate the representation of high spatial frequency features in the SC. (A)** Example  
 462 microsaccade-free fixation epoch from two control trials (right and left) having either a large (left) or small (right)  
 463 ocular position drift in the horizontal direction. We only picked epochs in which eye position remained within a  
 464 confined spatial window despite the drift variations (Methods). **(B)** Vertical eye positions from the same two  
 465 trials as in **A**. The epoch with high horizontal drift had low vertical deviation (left), and the epoch with low  
 466 horizontal drift had high vertical deviation (right). **(C)** For all control trials with a high spatial frequency grating,  
 467 we measured firing rate in a 50 ms interval (gray in **A**, **B**) preceded by a 200-ms microsaccade-free fixation epoch,  
 468 and we divided the epochs as having a horizontal deviation larger (x-axis) or smaller (y-axis) than the median  
 469 horizontal deviation across all epochs in a given neuron. Instantaneous firing rates preceded by a period of large  
 470 horizontal position deviations (orthogonal to the vertical grating) were associated with systematically higher  
 471 firing rates. **(D)** This effect was absent when assessing the impact of large and small vertical eye position drifts  
 472 relative to the vertical gratings. **(E, F)** For a low spatial frequency grating, neither horizontal **(E)** nor vertical **(F)**  
 473 drifts significantly modulated neural activity. For horizontal drifts, this is consistent with the sizes of eye position  
 474 drifts relative to the gratings' luminance spatial profiles (Figs. 1, S3A, B). For vertical drifts, this is consistent with  
 475 the lack of significant luminance modulation of the vertical pattern by a subtle vertical image displacement.

476  
 477  
 478  
 479 **Discussion**

480  
 481 We found that individual SC neurons, even with large RF's, are sensitive to minute  
 482 displacements of visual patterns caused by ocular position drifts on the order of 1 min arc in  
 483 amplitude. We were particularly motivated by the question of whether the diverse visual  
 484 capabilities of the primate SC, which are becoming increasingly evident, include being  
 485 sensitive to local feature patterns that are significantly smaller than the RF's themselves (Fig.  
 486 1B). Thus, we investigated whether subtle shifts of these patterns caused by ocular position  
 487 drifts, representing the lower limit of natural self-induced image displacements, can reliably  
 488 and systematically modulate SC neural activity. We employed retinal image stabilization to  
 489 experimentally control the location and motion of a given pattern over the RF at any one  
 490 moment in time. If the RF's grossly integrated information all over their spatial extents, then



491 subtle shifts of a given pattern (Fig. 1B) should not have resulted in altered neural responses.  
492 In contrast, we found robust neural modulations, which were also direction-dependent.  
493 Thus, even though SC neurons may have large RF's, they still exhibit sensitivity to highly local  
494 image features. This idea is consistent with the notion that the primate SC can contribute to  
495 visual scene analysis<sup>4,5,26</sup> and object processing<sup>6,27-30</sup> in a variety of ways.

496  
497 Our results are relevant with respect to theoretical predictions on how eye position drifts  
498 can reformat visual images by introducing temporal fluctuations of image luminance at any  
499 one position on the retina<sup>13-16,31</sup>. Such image reformatting happens by virtue of a physical  
500 rotation, albeit small, of the eyeball when viewing a stationary image. However, for such a  
501 reformatting to actually influence perception in a meaningful way, then neural elements  
502 downstream of the retina must be sensitive to its consequences. With small foveal RF's, say  
503 in the lateral geniculate nucleus or primary visual cortex, this idea might be expected  
504 because small ocular position drifts can displace stimuli in and out of the equally small RF's;  
505 that is, the scale of image shifts is similar to the scale of foveal (and perifoveal) RF sizes.  
506 However, whether larger RF's (e.g. extrafoveally), and particularly within an area that is  
507 more traditionally investigated from the perspective of motor control like the SC, can still  
508 benefit from such reformatting was not equally clear. We found this to be the case, adding  
509 to the increasingly rich repertoire of visual capabilities of the primate SC described in the  
510 literature. Thus, visual reformatting by ocular position drifts for the benefit of perception  
511 can extend also beyond the fovea, and it has direct neural consequences downstream of the  
512 retina.

513  
514 An additional interesting implication of our results concerns the degree of correlation  
515 between the two eyes during ocular position drifts. We experimentally stabilized our grating  
516 images based on the motion of only one eye (Methods), and we still observed very  
517 systematic neural modulations. This means that there must have been at least a minimal  
518 amount of correlation between the motions of the two eyes. Otherwise, our retinal image  
519 stabilization conditions would have created disparities between the left and right eye images  
520 that might have blurred the gratings too much. This would not have necessarily increased  
521 the gain and directional sensitivity of neural responses with retinal image stabilization like  
522 we saw. Therefore, it will be important in future work to better investigate binocular  
523 coordination in ocular position drifts during gaze fixation. Indeed, the question of whether  
524 ocular position drifts are correlated (either positively or negatively) between the two eyes  
525 has been investigated in the past, with a variety of observations and interpretations<sup>12,32</sup>. It  
526 has also been previously shown that primates are capable of controlling slow eye  
527 movements with speeds and position changes similar to those obtained with ocular position  
528 drifts during fixation<sup>20,33,34</sup>.

529  
530 In yet additional future experiments, stabilization based on only one eye motion could be  
531 exploited experimentally to investigate the strength of binocular and monocular visual input  
532 integration in the SC. Specifically, it is known that most of the SC is binocular<sup>1,35-37</sup>. However,  
533 it could be that some neurons' activity may be dominated by one eye input or the other.  
534 Therefore, in follow up experiments, one can repeat our study but with stabilization, in  
535 separate trials, based on the separate eyes (e.g. stabilization in one trial based on right eye  
536 motion and stabilization in another trial based on left eye motion). If a particular SC neuron  
537 is functionally dominated by input from one eye, then stabilization with one of the eyes  
538 should cause larger modulations than stabilization based on the motion of the other eye.

539 This would allow investigating potential ocular dominance of visual information in individual  
540 neurons in the awake monkey SC. Moreover, with sufficient mapping across the SC  
541 topographic map using such an experiment, it may then be possible to find individual zones  
542 in the SC that are potentially dominated (while remaining generally binocular) by visual input  
543 from one eye or the other, similar to the finding of orientation tuning zones in the mouse SC  
544 <sup>38,39</sup>.

545  
546 Since microsaccades are a component of fixational eye movements, it is also likely that they  
547 cause similar visual modulations to ocular drifts, but with different spatial and temporal  
548 parameters due to the faster and larger nature of microsaccades. This is exactly what we  
549 saw recently in the SC <sup>25</sup>, and it is also consistent with calculations of the different  
550 spatiotemporal consequences of saccades on visual images relative to ocular position drifts  
551 <sup>40</sup>. In any case, it is highly unlikely that microsaccades explain our results in the current  
552 study, because we excluded these movements from analysis. Also, the microsaccade  
553 characteristics were not altered by our retinal image stabilization manipulations but the  
554 neural activity was. Therefore, our experiment isolated the effects of the smaller and slower  
555 ocular position drifts on SC activity.

556  
557 In all, our results highlight the importance of investigating active vision <sup>41</sup> in the SC <sup>42</sup> and in  
558 other visual areas<sup>18,43,44</sup>, whether by careful analysis of the image consequences of eye  
559 movements on the retina with stable targets (as in Fig. 7) or by experimentally altering the  
560 normal visual-motor loop by gaze-contingent manipulation (as in Fig. 3). This would be even  
561 more important by using rich visual stimuli – like gratings, textures, and patterns – and even  
562 natural images.

563  
564  
565



566 **Acknowledgements**

567

568 We were funded by the Deutsche Forschungsgemeinschaft (DFG): (1) SFB 1233, Robust  
569 Vision: Inference Principles and Neural Mechanisms, TP 11, project number: 276693517; and  
570 (2) Werner Reichardt Centre for Integrative Neuroscience excellence cluster (EXC307).

571

572

573 **Author contributions**

574

575 CYC and ZMH collected the data. ZMH and FK analyzed the data. ZMH wrote the manuscript.  
576 ZMH, CYC, and FK edited the manuscript.

577

578

579 **Declaration of interests**

580

581 The authors declare no competing interests.

582

583

## 584 References

585

- 586 1. Cynader, M., and Berman, N. (1972). Receptive-field organization of monkey superior  
587 colliculus. *J Neurophysiol* 35, 187-201.
- 588 2. Goldberg, M.E., and Wurtz, R.H. (1972). Activity of superior colliculus in behaving  
589 monkey. I. Visual receptive fields of single neurons. *J Neurophysiol* 35, 542-559.
- 590 3. Chen, C.Y., Hoffmann, K.P., Distler, C., and Hafed, Z.M. (2019). The Foveal Visual  
591 Representation of the Primate Superior Colliculus. *Curr Biol* 29, 2109-2119 e2107.  
592 [10.1016/j.cub.2019.05.040](https://doi.org/10.1016/j.cub.2019.05.040).
- 593 4. Tailby, C., Cheong, S.K., Pietersen, A.N., Solomon, S.G., and Martin, P.R. (2012).  
594 Colour and pattern selectivity of receptive fields in superior colliculus of marmoset  
595 monkeys. *J Physiol-London* 590, 4061-4077. [10.1113/jphysiol.2012.230409](https://doi.org/10.1113/jphysiol.2012.230409).
- 596 5. Chen, C.Y., Sonnenberg, L., Weller, S., Witschel, T., and Hafed, Z.M. (2018). Spatial  
597 frequency sensitivity in macaque midbrain. *Nat Commun* 9, 2852. [10.1038/s41467-  
598 018-05302-5](https://doi.org/10.1038/s41467-018-05302-5).
- 599 6. Bogadhi, A.R., and Hafed, Z.M. (2022). Express detection and discrimination of visual  
600 objects by primate superior colliculus neurons. *BioRxiv*. [10.1101/2022.02.08.479583](https://doi.org/10.1101/2022.02.08.479583).
- 601 7. White, B.J., Berg, D.J., Kan, J.Y., Marino, R.A., Itti, L., and Munoz, D.P. (2017). Superior  
602 colliculus neurons encode a visual saliency map during free viewing of natural  
603 dynamic video. *Nat Commun* 8, 14263. [10.1038/ncomms14263](https://doi.org/10.1038/ncomms14263).
- 604 8. Robinson, D.A. (1972). Eye movements evoked by collicular stimulation in the alert  
605 monkey. *Vision Res* 12, 1795-1808. [0042-6989\(72\)90070-3](https://doi.org/10.1016/0042-6989(72)90070-3) [pii].
- 606 9. Hafed, Z.M., and Chen, C.Y. (2016). Sharper, Stronger, Faster Upper Visual Field  
607 Representation in Primate Superior Colliculus. *Curr Biol* 26, 1647-1658.  
608 [10.1016/j.cub.2016.04.059](https://doi.org/10.1016/j.cub.2016.04.059).
- 609 10. Adler, f., and Fliegelman, m. (1934). Influence of fixation on the visual acuity.  
610 *Archives of Ophthalmology* 12, 475-483.
- 611 11. Barlow, H.B. (1952). Eye movements during fixation. *J Physiol* 116, 290-306.
- 612 12. Krauskopf, J., Cornsweet, T.N., and Riggs, L.A. (1960). Analysis of eye movements  
613 during monocular and binocular fixation. *J Opt Soc Am* 50, 572-578.  
614 [10.1364/josa.50.000572](https://doi.org/10.1364/josa.50.000572).
- 615 13. Rucci, M., Iovin, R., Poletti, M., and Santini, F. (2007). Miniature eye movements  
616 enhance fine spatial detail. *Nature* 447, 851-854. [nature05866](https://doi.org/10.1038/nature05866) [pii]  
617 [10.1038/nature05866](https://doi.org/10.1038/nature05866).
- 618 14. Kuang, X., Poletti, M., Victor, J.D., and Rucci, M. (2012). Temporal encoding of spatial  
619 information during active visual fixation. *Current biology : CB* 22, 510-514.  
620 [10.1016/j.cub.2012.01.050](https://doi.org/10.1016/j.cub.2012.01.050).
- 621 15. Rucci, M., and Victor, J.D. (2015). The unsteady eye: an information-processing stage,  
622 not a bug. *Trends Neurosci*. [10.1016/j.tins.2015.01.005](https://doi.org/10.1016/j.tins.2015.01.005).
- 623 16. Ahissar, E., and Arieli, A. (2001). Figuring space by time. *Neuron* 32, 185-201.  
624 [10.1016/s0896-6273\(01\)00466-4](https://doi.org/10.1016/s0896-6273(01)00466-4).
- 625 17. Gur, M., and Snodderly, D.M. (1987). Studying striate cortex neurons in behaving  
626 monkeys: benefits of image stabilization. *Vision Res* 27, 2081-2087. [0042-  
627 6989\(87\)90122-2](https://doi.org/10.1016/0042-6989(87)90122-2) [pii].
- 628 18. Segal, I.Y., Giladi, C., Gedalin, M., Rucci, M., Ben-Tov, M., Kushinsky, Y., Mokeichev,  
629 A., and Segev, R. (2015). Decorrelation of retinal response to natural scenes by  
630 fixational eye movements. *Proc Natl Acad Sci U S A*. [10.1073/pnas.1412059112](https://doi.org/10.1073/pnas.1412059112).

- 631 19. Tian, X., Yoshida, M., and Hafed, Z.M. (2016). A Microsaccadic Account of Attentional  
632 Capture and Inhibition of Return in Posner Cueing. *Frontiers in systems neuroscience*  
633 *10*, 23. 10.3389/fnsys.2016.00023.
- 634 20. Tian, X., Yoshida, M., and Hafed, Z.M. (2018). Dynamics of fixational eye position and  
635 microsaccades during spatial cueing: the case of express microsaccades. *J*  
636 *Neurophysiol* *119*, 1962-1980. 10.1152/jn.00752.2017.
- 637 21. Cherici, C., Kuang, X., Poletti, M., and Rucci, M. (2012). Precision of sustained fixation  
638 in trained and untrained observers. *Journal of vision* *12*. 10.1167/12.6.31.
- 639 22. Engbert, R., and Kliegl, R. (2004). Microsaccades keep the eyes' balance during  
640 fixation. *Psychol Sci* *15*, 431-436. 10.1111/j.0956-7976.2004.00697.x  
641 PSCI697 [pii].
- 642 23. Snodderly, D.M., Kagan, I., and Gur, M. (2001). Selective activation of visual cortex  
643 neurons by fixational eye movements: implications for neural coding. *Vis Neurosci*  
644 *18*, 259-277.
- 645 24. Tang, Y., Saul, A., Gur, M., Goei, S., Wong, E., Ersoy, B., and Snodderly, D.M. (2007).  
646 Eye position compensation improves estimates of response magnitude and receptive  
647 field geometry in alert monkeys. *J Neurophysiol* *97*, 3439-3448. 00881.2006 [pii]  
648 10.1152/jn.00881.2006.
- 649 25. Khademi, F., Chen, C.-Y., and Hafed, Z.M. (2020). Visual feature tuning of superior  
650 colliculus neural reafferent responses after fixational microsaccades. *Journal of*  
651 *Neurophysiology* *123*, 2136-2153. 10.1152/jn.00077.2020.
- 652 26. Chen, C.Y., and Hafed, Z.M. (2018). Orientation and Contrast Tuning Properties and  
653 Temporal Flicker Fusion Characteristics of Primate Superior Colliculus Neurons. *Front*  
654 *Neural Circuits* *12*, 58. 10.3389/fncir.2018.00058.
- 655 27. Maior, R.S., Hori, E., Barros, M., Teixeira, D.S., Tavares, M.C., Ono, T., Nishijo, H., and  
656 Tomaz, C. (2011). Superior colliculus lesions impair threat responsiveness in infant  
657 capuchin monkeys. *Neurosci Lett* *504*, 257-260. 10.1016/j.neulet.2011.09.042.
- 658 28. Nguyen, M.N., Matsumoto, J., Hori, E., Maior, R.S., Tomaz, C., Tran, A.H., Ono, T., and  
659 Nishijo, H. (2014). Neuronal responses to face-like and facial stimuli in the monkey  
660 superior colliculus. *Front Behav Neurosci* *8*, 85. 10.3389/fnbeh.2014.00085.
- 661 29. Nguyen, M.N., Nishimaru, H., Matsumoto, J., Van Le, Q., Hori, E., Maior, R.S., Tomaz,  
662 C., Ono, T., and Nishijo, H. (2016). Population Coding of Facial Information in the  
663 Monkey Superior Colliculus and Pulvinar. *Front Neurosci* *10*, 583.  
664 10.3389/fnins.2016.00583.
- 665 30. Le, Q.V., Le, Q.V., Nishimaru, H., Matsumoto, J., Takamura, Y., Hori, E., Maior, R.S.,  
666 Tomaz, C., Ono, T., and Nishijo, H. (2020). A Prototypical Template for Rapid Face  
667 Detection Is Embedded in the Monkey Superior Colliculus. *Frontiers in systems*  
668 *neuroscience* *14*, 5. 10.3389/fnsys.2020.00005.
- 669 31. Ahissar, E., and Arieli, A. (2012). Seeing via Miniature Eye Movements: A Dynamic  
670 Hypothesis for Vision. *Frontiers in computational neuroscience* *6*, 89.  
671 10.3389/fncom.2012.00089.
- 672 32. Poletti, M., Aytakin, M., and Rucci, M. (2015). Head-Eye Coordination at a  
673 Microscopic Scale. *Curr Biol* *25*, 3253-3259. 10.1016/j.cub.2015.11.004.
- 674 33. Skinner, J., Buonocore, A., and Hafed, Z.M. (2019). Transfer function of the rhesus  
675 macaque oculomotor system for small-amplitude slow motion trajectories. *J*  
676 *Neurophysiol* *121*, 513-529. 10.1152/jn.00437.2018.
- 677 34. Intoy, J., and Rucci, M. (2020). Finely tuned eye movements enhance visual acuity.  
678 *Nat Commun* *11*, 795. 10.1038/s41467-020-14616-2.

- 679 35. Hubel, D.H., LeVay, S., and Wiesel, T.N. (1975). Mode of termination of retinotectal  
680 fibers in macaque monkey: an autoradiographic study. *Brain Res* 96, 25-40.
- 681 36. Pollack, J.G., and Hickey, T.L. (1979). The distribution of retino-collicular axon  
682 terminals in rhesus monkey. *J Comp Neurol* 185, 587-602. [10.1002/cne.901850402](https://doi.org/10.1002/cne.901850402).
- 683 37. Schiller, P.H., Stryker, M., Cynader, M., and Berman, N. (1974). Response  
684 characteristics of single cells in the monkey superior colliculus following ablation or  
685 cooling of visual cortex. *J Neurophysiol* 37, 181-194. [10.1152/jn.1974.37.1.181](https://doi.org/10.1152/jn.1974.37.1.181).
- 686 38. Ahmadi, M., and Heimel, J.A. (2015). Preference for concentric orientations in the  
687 mouse superior colliculus. *Nat Commun* 6, 6773. [10.1038/ncomms7773](https://doi.org/10.1038/ncomms7773).
- 688 39. Feinberg, E.H., and Meister, M. (2015). Orientation columns in the mouse superior  
689 colliculus. *Nature* 519, 229-232. [10.1038/nature14103](https://doi.org/10.1038/nature14103).
- 690 40. Mostofi, N., Zhao, Z., Intoy, J., Boi, M., Victor, J.D., and Rucci, M. (2020).  
691 Spatiotemporal Content of Saccade Transients. *Curr Biol* 30, 3999-4008 e3992.  
692 [10.1016/j.cub.2020.07.085](https://doi.org/10.1016/j.cub.2020.07.085).
- 693 41. Rolfs, M., and Schweitzer, R. (2022). Coupling perception to action through incidental  
694 sensory consequences of motor behaviour. *Nat Rev Psychol* 1, 112-123.  
695 [10.1038/s44159-021-00015-x](https://doi.org/10.1038/s44159-021-00015-x).
- 696 42. Hafed, Z.M., Chen, C.Y., Tian, X., Baumann, M., and Zhang, T. (2021). Active vision at  
697 the foveal scale in the primate superior colliculus. *J Neurophysiol*.  
698 [10.1152/jn.00724.2020](https://doi.org/10.1152/jn.00724.2020).
- 699 43. Greschner, M., Bongard, M., Rujan, P., and Ammermuller, J. (2002). Retinal ganglion  
700 cell synchronization by fixational eye movements improves feature estimation. *Nat*  
701 *Neurosci* 5, 341-347. [10.1038/nn821](https://doi.org/10.1038/nn821).
- 702 44. Kagan, I., Gur, M., and Snodderly, D.M. (2008). Saccades and drifts differentially  
703 modulate neuronal activity in V1: effects of retinal image motion, position, and  
704 extraretinal influences. *J Vis* 8, 19 11-25. [10.1167/8.14.19](https://doi.org/10.1167/8.14.19)  
705 [/8/14/19/ \[pii\]](https://doi.org/10.1167/8.14.19).
- 706 45. Chen, C.Y., Ignashchenkova, A., Thier, P., and Hafed, Z.M. (2015). Neuronal Response  
707 Gain Enhancement prior to Microsaccades. *Curr Biol* 25, 2065-2074.  
708 [10.1016/j.cub.2015.06.022](https://doi.org/10.1016/j.cub.2015.06.022).
- 709 46. Chen, C.Y., and Hafed, Z.M. (2013). Postmicrosaccadic enhancement of slow eye  
710 movements. *The Journal of neuroscience : the official journal of the Society for*  
711 *Neuroscience* 33, 5375-5386. [10.1523/JNEUROSCI.3703-12.2013](https://doi.org/10.1523/JNEUROSCI.3703-12.2013).
- 712 47. Brainard, D.H. (1997). The Psychophysics Toolbox. *Spatial vision* 10, 433-436.
- 713 48. Pelli, D.G. (1997). The VideoToolbox software for visual psychophysics: transforming  
714 numbers into movies. *Spatial vision* 10, 437-442.
- 715 49. Kleiner, M., Brainard, D., and Pelli, D.G. (2007). What's new in Psychtoolbox-3?  
716 (Abstract). *Perception* 36.
- 717 50. Hafed, Z.M., and Ignashchenkova, A. (2013). On the dissociation between  
718 microsaccade rate and direction after peripheral cues: microsaccadic inhibition  
719 revisited. *J Neurosci* 33, 16220-16235. [10.1523/JNEUROSCI.2240-13.2013](https://doi.org/10.1523/JNEUROSCI.2240-13.2013).
- 720 51. Fuchs, A.F., and Robinson, D.A. (1966). A method for measuring horizontal and  
721 vertical eye movement chronically in the monkey. *J Appl Physiol* 21, 1068-1070.
- 722 52. Judge, S.J., Richmond, B.J., and Chu, F.C. (1980). Implantation of magnetic search  
723 coils for measurement of eye position: an improved method. *Vision Res* 20, 535-538.
- 724 53. Chen, C.Y., and Hafed, Z.M. (2017). A neural locus for spatial-frequency specific  
725 saccadic suppression in visual-motor neurons of the primate superior colliculus. *J*  
726 *Neurophysiol* 117, 1657-1673. [10.1152/jn.00911.2016](https://doi.org/10.1152/jn.00911.2016).

- 727 54. Buonocore, A., Tian, X., Khademi, F., and Hafed, Z.M. (2021). Instantaneous  
728 movement-unrelated midbrain activity modifies ongoing eye movements. *eLife* *10*.  
729 10.7554/eLife.64150.
- 730 55. Santini, F., Redner, G., Iovin, R., and Rucci, M. (2007). EyeRIS: a general-purpose  
731 system for eye-movement-contingent display control. *Behav Res Methods* *39*, 350-  
732 364.
- 733 56. Poletti, M., and Rucci, M. (2010). Eye movements under various conditions of image  
734 fading. *J Vis* *10*, 6 1-18. 10.1167/10.3.6  
735 /10/3/6/ [pii].
- 736 57. Bellet, M.E., Bellet, J., Nienborg, H., Hafed, Z.M., and Berens, P. (2019). Human-level  
737 saccade detection performance using deep neural networks. *J Neurophysiol* *121*,  
738 646-661. 10.1152/jn.00601.2018.
- 739 58. Zuber, B.L., Stark, L., and Cook, G. (1965). Microsaccades and the velocity-amplitude  
740 relationship for saccadic eye movements. *Science* *150*, 1459-1460.
- 741 59. Hafed, Z.M., Goffart, L., and Krauzlis, R.J. (2009). A neural mechanism for  
742 microsaccade generation in the primate superior colliculus. *Science* *323*, 940-943.  
743 323/5916/940 [pii]  
744 10.1126/science.1166112.
- 745 60. Willeke, K.F., Tian, X., Buonocore, A., Bellet, J., Ramirez-Cardenas, A., and Hafed, Z.M.  
746 (2019). Memory-guided microsaccades. *Nat Commun* *10*, 3710. 10.1038/s41467-019-  
747 11711-x.
- 748 61. Engbert, R., and Kliegl, R. (2003). Microsaccades uncover the orientation of covert  
749 attention. *Vision Res* *43*, 1035-1045. S0042698903000841 [pii].
- 750 62. Hafed, Z.M., Lovejoy, L.P., and Krauzlis, R.J. (2011). Modulation of microsaccades in  
751 monkey during a covert visual attention task. *Journal of Neuroscience* *31*, 15219-  
752 15230. 10.1523/JNEUROSCI.3106-11.2011.
- 753  
754

## 755 **Methods**

756

### 757 *Experimental animals and ethics approvals*

758 We recorded superior colliculus (SC) neural activity from two adult, male rhesus macaque  
759 monkeys (N and P) aged 7 years, and weighing 8 kg and 7 kg, respectively. The experiments  
760 were approved by ethics committees at the regional governmental offices of the city of  
761 Tübingen.

762

763

### 764 *Laboratory setup and animal preparation*

765 The experiments were conducted in the same laboratory as that described in earlier  
766 publications<sup>3,9,45</sup>. Briefly, the monkeys were seated in a darkened booth approximately 45  
767 cm from a calibrated and linearized CRT display spanning approximately +/-22 deg  
768 horizontally and +/-15 deg vertically. Data acquisition and stimulus control were managed by  
769 a custom-made, real-time computing system<sup>19,46</sup>, interfacing with the Psychophysics  
770 Toolbox<sup>47-49</sup> and a Multi-Channel Acquisition Processor (MAP) data acquisition device  
771 (Plexon, Inc.).

772

773 The monkeys were prepared for behavioral training and electrophysiological recordings  
774 earlier<sup>46,50</sup>. Specifically, each monkey was implanted with a head-holder and scleral search  
775 coil in one eye<sup>46</sup>. The search coil allowed tracking eye movements using the magnetic  
776 induction technique<sup>51,52</sup>, and the head-holder comfortably stabilized head position during  
777 the experiments. The monkeys also each had a recording chamber centered on the midline  
778 and tilted 38 deg (monkey P) or 35 deg (monkey N) posterior of vertical, allowing access to  
779 both the right and left SC<sup>45</sup>.

780

781

### 782 *Behavioral task*

783 We employed a gaze fixation task in which we presented static gabor gratings of different  
784 spatial frequencies within the receptive fields (RF's) of the recorded neurons. Unlike in our  
785 earlier work with spatial frequency mapping in the SC<sup>5,53</sup>, we maintained the stimulus on the  
786 display for much longer during fixation<sup>54</sup>. Specifically, once we identified the size and  
787 location of an RF, we designed a gabor of suitable size to fill the RF. The grating always had  
788 high contrast (100%) and one of three different spatial frequencies (0.56, 2.22, or 4.44 cpd),  
789 which were varied across trials (the phase of the gabor was also random from trial to trial).

790

791 A trial started with the onset of a central white fixation dot over a gray background. After  
792 the monkey fixated the spot in a stable manner for a random interval spanning a few  
793 hundred milliseconds, the grating appeared in the RF and remained on for approximately  
794 1500 ms. The fixation spot was small (8.5 x 8.5 min arc), and it had a luminance of 72 cd/m<sup>2</sup>.  
795 The gray background had 21 cd/m<sup>2</sup> luminance. If the monkey successfully fixated the spot  
796 for the entire duration of the trial, it was rewarded with fruit juice, and another trial was  
797 initiated after a short blank-screen interval.

798

799 Four different trial types were interleaved. In the control condition, both the fixation spot  
800 and grating were stable on the display. This condition was analyzed for microsaccade-  
801 induced visual reafferent responses in a recent study<sup>25</sup>, as well as for interactions between  
802 spiking activity and microsaccade kinematics<sup>54</sup>. The sustained firing rates during



803 microsaccade-free fixation, as well as all the remaining three trial types of the task, were  
804 never described in any other publications. The additional trial types constituted our retinal  
805 image stabilization manipulations (Fig. 1). In full retinal image stabilization (Fig. 1C), the  
806 grating (from the moment it appeared until trial end) was moved in lockstep with  
807 instantaneous eye position (see next section). The fixation spot always remained stable on  
808 the display to help anchor gaze properly and not alter the eye movement statistics (Figs. S1-  
809 S3). This was necessary because we wanted to isolate the influences of (slow) fixational eye  
810 movements on neural activity and, therefore, had to ensure that the eye movements  
811 themselves were occurring as naturally as possible. In horizontal retinal image stabilization  
812 (Fig. 1D), the vertical position of the grating was kept constant on the display and unchanged  
813 from control; the horizontal position of the grating was moved in lockstep with horizontal  
814 eye position. Finally, in vertical retinal image stabilization (Fig. 1E), the horizontal position of  
815 the grating was stable on the display and similar to the control condition, whereas the  
816 vertical position of the grating was moved in synchrony with vertical eye position.

817

818 In a subset of experiments, we replaced the vertical gratings with horizontal ones, in order  
819 to explore the relative relationship between eye movement directions and image pattern  
820 orientations (e.g. Fig. 4).

821

822 We collected approximately 18 trial repetitions per condition per neuron.

823

824

### 825 *Retinal image stabilization*

826 We first calibrated eye position measurements using methods described earlier<sup>19</sup>. Briefly, at  
827 the beginning of every session, the monkeys fixated (multiple times) a series of 19 locations  
828 on the display for at least 1000 ms. We then measured raw voltages during stable fixation  
829 from each location. To convert the raw voltages to degrees of angular rotation, we used a  
830 multi-order polynomial including both the horizontal and vertical raw voltages, as well as  
831 cross-channel interaction terms<sup>19</sup>.

832

833 We then employed our real-time gaze-contingent display system<sup>19,20,46</sup>. In this system, we  
834 sampled and processed eye positions at 1 KHz using a real-time control system, and we  
835 updated the display at 120 Hz (constrained by the display technology). In retinal image  
836 stabilization trials, after every display refresh time, we sampled new eye positions and  
837 processed them. We then calculated the position of the grating according to the new eye  
838 positions, and we updated the display at the next frame refresh. Thus, our retinal image  
839 stabilization trials discretized eye positions at 120 Hz (the bottleneck imposed by the display  
840 refresh rate). Such a rate is suitable for successful retinal image stabilization with slow eye  
841 movements, as shown previously by our<sup>19,20</sup> and other<sup>13,17,55,56</sup> laboratories. In fact, even  
842 with microsaccades, Fig. S5 shows that the microsaccade-related reafferent responses were  
843 reduced by retinal image stabilization at 120 Hz. This means that while the microsaccades  
844 were still a bit too rapid for the display's 120 Hz frequency, the stimulus was still moved  
845 sufficiently rapidly to catch up with the real microsaccade and reduce the retinal slip of the  
846 grating by the eye movement (and, therefore, the associated reafferent response).

847

848 Finally, eye coil systems often exhibit a slow drift in their measurements, which is much  
849 slower than ocular position drifts (we confirmed this by comparing initial fixation positions  
850 across trials and assessing a time constant of eye coil system drift, which was more than two



851 orders of magnitude slower than within-trial ocular position drifts). Therefore, at the  
852 beginning of every trial, we performed a drift correction that was applied for all subsequent  
853 eye position measurements within a trial. We did this by averaging eye position in the final  
854 50 ms before gabor onset and using this measurement as a reference to which we compared  
855 all subsequent eye positions in the trial. In post-hoc analyses, if there was a microsaccade in  
856 the drift correction measurement interval, the trial was excluded from further analysis.

857

858

### 859 *Eye movement data analysis*

860 We detected saccades and microsaccades as described previously<sup>25,46,57</sup>. We used the  
861 detections for two primary purposes. First, we established that microsaccade properties  
862 were not altered by our retinal image stabilization manipulations (Fig. S2). Second, for our  
863 neural analyses, we excluded all data starting from 10 ms before microsaccade onset until 90  
864 ms after microsaccade end. This was done in order to avoid movement-induced reafferent  
865 responses from the analyses (Fig. S5). We also inspected all trials for blinks, and we removed  
866 all blink intervals, including a period of 50 ms before and a period of 50 ms after each of  
867 them.

868

869 Our microsaccade analyses (Fig. S2) included microsaccade rate, directions, and main  
870 sequence<sup>58</sup> relationship between movement amplitude and peak velocity. For microsaccade  
871 rate, we used a running window of 25 ms width and moved in steps of 2 ms. Within each  
872 such time window, we counted the fraction of trials in which the window contained  
873 microsaccades across trials of a given condition. For microsaccade directions and main  
874 sequence relationships, we considered all microsaccades in the sustained fixation interval  
875 that we were interested in for our neural analyses (>300 ms after stimulus onset; see *Neural*  
876 *data analysis* below), and we plotted the distribution of movement vector angles (for the  
877 direction analysis) or the scatter of movement peak velocity versus movement radial  
878 amplitude (for the main sequence analysis). We performed all of these analyses separately  
879 for each of the four stimulus conditions (control and three retinal image stabilization  
880 versions), and we then compared the results to confirm that retinal image stabilization did  
881 not significantly alter the statistics of microsaccades.

882

883 To confirm that retinal image stabilization also did not alter absolute eye position (i.e. the  
884 combination of ocular position drifts and microsaccades), we also plotted the raw eye  
885 positions (in sustained fixation; >300 ms after stimulus onset) across all trials in each  
886 condition (Fig. S1).

887

888 We also analyzed ocular position drifts more specifically. For example, for Fig. S3C-F, we first  
889 excluded all microsaccades and their pre- and post-movement periods mentioned above.  
890 We then considered all sustained fixation intervals starting from 300 ms after stimulus onset  
891 in each trial. For every interval in between two successive microsaccades (which we called a  
892 saccade-free fixation interval), we measured mean eye position and subtracted it from every  
893 sample of eye position within the same interval. This gave us the instantaneous deviation of  
894 eye position from the mean position during the particular saccade-free interval of interest.  
895 In Fig. S3C, E, we then binned all such deviations across all fixation intervals and obtained a  
896 distribution of how much ocular position drifts altered eye position. For Fig. S3D, F, we also  
897 took the standard deviation of eye position within each microsaccade-free fixation interval.  
898 We then plotted the distribution of these measurements across all such intervals in Fig. S3D,

899 F. Our purpose in both cases was to highlight that the slow ocular position drifts had similar  
900 characteristics whether we ran control or retinal image stabilization trials (Fig. S3C-F), and  
901 also to predict the amounts of luminance modulations over the retina that were expected  
902 from our gratings and ocular position drift amplitudes (Fig. S3A, B).

903  
904

### 905 *Neural data analysis*

906 We recorded from 61 individually isolated SC neurons, which were first characterized online  
907 using delayed visually-guided and memory-guided saccade tasks<sup>9,45,53</sup>. The initial  
908 characterization allowed classifying the neurons as being visual or visual-motor, as well as  
909 assessing the neurons' RF sizes and locations. After establishing that a recorded neuron was  
910 visually-responsive, we ran the main behavioral task described above with the grating placed  
911 at the optimal RF position (except for some test examples like in Fig. S4). We included all  
912 visually-responsive neurons in our analyses, without further classification into visual or  
913 visual-motor categories. This was because our results were similar regardless of whether a  
914 neuron was purely visual or visual-motor in nature (the results were also highly consistent  
915 across the population; for example, Fig. S6A, B).

916

917 In both monkeys, we tested the neurons with vertical gratings. In monkey N, we additionally  
918 tested 35 neurons with horizontal gratings (27 of these neurons had both vertical and  
919 horizontal gratings tested together within the same session).

920

921 We analyzed neural data by counting spikes during the sustained fixation interval or by  
922 converting spike times into firing rate estimates (with a Gaussian convolution kernel of  $\sigma$  40  
923 ms). We defined the sustained fixation interval as the time from 300 ms to 1400 ms after  
924 grating onset. The lower bound of this time interval (300 ms) was chosen to avoid the initial  
925 visual onset response of the neurons (occurring immediately after grating onset); the upper  
926 bound was chosen to maximize the numbers of neurons that we could pool in the analyses.  
927 We did not notice a difference in the onset response strength (the initial visual burst after  
928 grating onset) across our different retinal image stabilization manipulations relative to  
929 control. Therefore, we did not analyze initial visual responses further. Rather, we were  
930 interested in assessing how subtle image displacements (i.e. during sustained presence of a  
931 stimulus within the RF's) affected SC neural activity. Our chosen interval of more than 1  
932 second (300 ms to 1400 ms from stimulus onset) was sufficient to do that.

933

934 As stated above, in all of our analyses, except for Fig. S5, we excluded all neural activity  
935 associated with microsaccades, in order to avoid contamination by microsaccade-induced  
936 reafferent responses<sup>25</sup> (Fig. S5 shows an example of such responses). We replaced all  
937 intervals starting from 10 ms before microsaccade onset to 90 ms after microsaccade end by  
938 not-a-number labels such that these intervals were not included when computing across-  
939 trial averages of firing rates or when computing inter-spike intervals. Note that all of our  
940 neurons were not microsaccade-related in the sense of emitting a motor burst at movement  
941 onset; they, therefore, did not exhibit prolonged buildup of discharge up to 100 ms before  
942 microsaccade onset<sup>59,60</sup>. This justified our choice of pre-microsaccadic mask interval (also  
943 see Fig. S5A).

944

945 For summarizing population firing rates (e.g. Fig. 3A), we first calculated the within-neuron  
946 average firing rate across trial repetitions of a given spatial frequency in the control

947 condition. We then normalized each trial's firing rate (for the same spatial frequency) by  
948 dividing the trial's instantaneous firing rate (at any given time after stimulus onset) by the  
949 peak of the average firing rate in the first 150 ms after stimulus onset. That is, we  
950 normalized each trial's firing rate to the peak average firing rate occurring in the early  
951 stimulus-evoked visual burst interval of the control condition. We repeated this trial-by-trial  
952 normalization procedure for all control trials of the same spatial frequency, and also for all  
953 trials of the retinal image stabilization conditions (again of the same spatial frequency). Thus,  
954 if a retinal image stabilization condition (e.g. full retinal image stabilization) elevated firing  
955 rates relative to control, then the normalized firing rates were also elevated. With all trials  
956 and all spatial frequencies normalized to each neuron's response in the respective control  
957 condition, we could then average normalized trials across neurons to get population firing  
958 rates like in Fig. 3A. This allowed us to visualize the neural modulation effects of retinal  
959 image stabilization, and to do further individual neuron and population analyses.

960  
961 Among such analyses, we calculated neural modulation indices (e.g. Fig. 3B). To do so, we  
962 measured raw firing rates at the individual neuron level across conditions. For each trial of a  
963 given spatial frequency, we evaluated the average sustained firing rate (300 ms to 1400 ms  
964 after stimulus onset, and with microsaccades removed as per the procedure described  
965 above). We did this in the control condition, and we averaged all measurements across trial  
966 repetitions ( $fr_{control}$ ). We then repeated this procedure for one of our retinal image  
967 stabilization manipulations (full, horizontal, or vertical retinal image stabilization) to obtain  
968  $fr_{stabilization}$  (the average within-neuron sustained firing rate during retinal image  
969 stabilization). Then, we calculated a modulation index comparing retinal image stabilization  
970 to control as:  $(fr_{stabilization} - fr_{control}) / (fr_{stabilization} + fr_{control})$ ; that is, the modulation index was the  
971 average sustained firing rate in a retinal image stabilization manipulation minus the average  
972 sustained firing rate in the control condition, divided by the sum of the two measurements.

973  
974 We plotted histograms of modulation indices across the entire population of neurons, with  
975 indications of the average modulation index across neurons (e.g. pink vertical line in Fig. 3B).  
976 We tested whether the population modulation indices were significantly different from zero  
977 using a t-test and reported p-values in the figures and/or text. In the Results text, we also  
978 often reported the average modulation index values as percentages by multiplying the  
979 values from the calculation above by 100. We also often compared neural modulation  
980 indices across conditions (e.g. comparing the effects of retinal image stabilization for high or  
981 low spatial frequency gratings). We did so by performing a t-test across the different  
982 conditions and reporting p-values.

983  
984 For scatter plots of individual neuron results, we followed similar procedures to those above  
985 for the modulation indices. For example, in Fig. S6A, we counted the number of spikes per  
986 trial in the sustained interval (i.e. per 1100 ms occurring between 300 ms and 1400 ms after  
987 stimulus onset) in either the control condition or the full retinal image stabilization  
988 condition. This resulted in a paired measurement per neuron (average spike count per  
989 control trial and average spike count per retinal image stabilization trial). We then plotted all  
990 of these measurements across the population as a scatter plot. Note that microsaccades  
991 were still excluded in such analyses, exactly as above. However, since microsaccade  
992 characteristics were unchanged across conditions (Fig. S2), the microsaccade exclusion was  
993 not inappropriately favoring one condition over the other when comparing the spike counts  
994 across them. Therefore, it was appropriate to exclude the occasionally occurring rapid eye

995 movements in this manner. Also note that the spike counts in these kinds of analyses were  
996 essentially estimates of average sustained firing rates. This is so because such spike counts  
997 were evaluated over an interval of approximately 1 second duration (1100 ms).

998

999 We also computed inter-spike intervals during sustained fixation in either control or one of  
1000 the retinal image stabilization manipulations (e.g. Fig. S6C). Because we excluded  
1001 microsaccades, there could be intervals within trials that were replaced with not-a-number  
1002 labels during the exclusion process. Therefore, for inter-spike interval measurements, we  
1003 first found contiguous blocks of fixation data within trials that existed in between successive  
1004 microsaccades. Then, we computed inter-spike intervals within all such contiguous blocks.  
1005 This allowed us to avoid counting inter-spike intervals during (and around) microsaccades,  
1006 and also to avoid having erroneously large inter-spike intervals due to the not-a-number  
1007 labels introduced during preprocessing (e.g. if we had counted two spikes on either side of a  
1008 not-a-number block of data).

1009

1010 For summarizing microsaccade-induced reafferent responses at the individual neuron level  
1011 in Fig. S5B, we used a similar procedure to our earlier analyses (e.g. Fig. S6A). The only  
1012 difference is that our measurement interval was now different. Here, for each microsaccade  
1013 in a given condition, we measured the firing rate in the interval 30-80 ms after microsaccade  
1014 onset (see gray bar on the x-axis in Fig. S5A). This interval captured the reafferent response.  
1015 We then compared, within each neuron, the average response with and without retinal  
1016 image stabilization (Fig. S5B).

1017

1018 For some of our analyses, we selected neurons according to their preferred eccentricities or  
1019 visual field locations. For example, we categorized neurons based on whether they were  
1020 foveal or extrafoveal (Fig. 6); or whether they were part of the upper or lower visual field  
1021 representation of the SC (Figs. S10, S11). To do so, we classified neurons according to the  
1022 eccentricity and direction from horizontal of their RF hotspots (Fig. S9).

1023

1024 Finally, for Fig. 7, our goal was to ask whether horizontal or vertical ocular position drifts in  
1025 control trials were still sufficient to modulate SC neural responses in a manner that was  
1026 consistent with the retinal image stabilization results. For every control trial of a given  
1027 spatial frequency, we had a moving window of 250 ms duration (starting from 300 ms after  
1028 stimulus onset and in steps of 1 ms). If the window was devoid of microsaccades (including  
1029 the pre- and post-microsaccadic masks described above) and the eye position was within +/-  
1030 3 min arc (horizontally and vertically) from the initial fixation position, we measured eye  
1031 position variability (horizontal or vertical) in the first 200 ms of the interval and firing rate in  
1032 the final 50 ms of the interval. That is, we assumed that SC neurons integrate the recent  
1033 history (200 ms) of the image over the RF's in their instantaneous firing rate. This was  
1034 justified based on prior measurements of the temporal properties of SC neurons<sup>26</sup>. Our  
1035 measure of variability was the standard deviation of eye position during the interval. We  
1036 then did a median split based on this variability across all microsaccade-free epochs of a  
1037 given neuron, and we compared firing rates for high or low variability trials. We did this  
1038 independently for horizontal and vertical variability. Thus, for vertical gratings, we could  
1039 compare epochs with high variability of horizontal eye position (orthogonal to the grating) to  
1040 epochs with low variability of horizontal eye position. If our retinal image stabilization results  
1041 were indeed related to the image luminance modulations of orthogonal eye position shifts,  
1042 then such comparison would yield a difference between high and low horizontal drift

1043 variability. Similarly, if we now compared epochs of low and high vertical eye position  
1044 variability, we would have expected no neural effects (analogous to parallel retinal image  
1045 stabilization). We did this procedure for all neurons and across different spatial frequencies.  
1046  
1047  
1048  
1049  
1050

1051 **Supplementary figures**

1052

1053

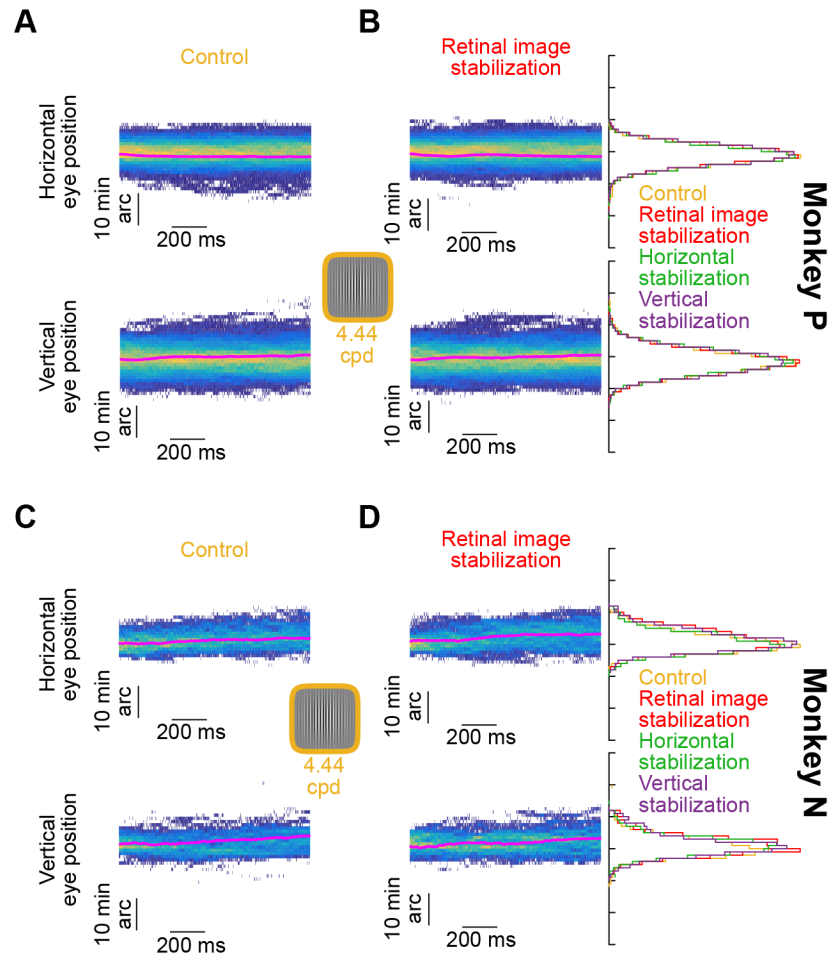

1054

1055

1056 **Figure S1 Similarity of fixational eye positions during retinal image stabilization and control trials. (A)**

1057 Histograms of raw horizontal (top) and vertical (bottom) eye positions from monkey P as a function of time from

1058 stimulus onset, in the interval from 300 ms to 1400 ms (control trials with a 4.44 cpd gabor grating are shown).

1059 The thick pink line in each histogram is the mean eye position. **(B)** Same as **A** but for full retinal image

1060 stabilization. The marginal histograms on the right show the distributions of eye positions (across all times) for

1061 the control condition, the retinal image stabilization condition (red), as well as the two other retinal image

1062 stabilization conditions of Fig. 1D, E. The distributions of eye positions were similar across all conditions,

1063 suggesting that retinal image stabilization did not alter eye movement characteristics in our experiments

1064 (Methods). **(C, D)** Same as **A, B** but for monkey N. The same results were observed in both monkeys for the low

1065 (0.56 cpd) and intermediate (2.22 cpd) spatial frequency trials.

1066

1067

1068



1069

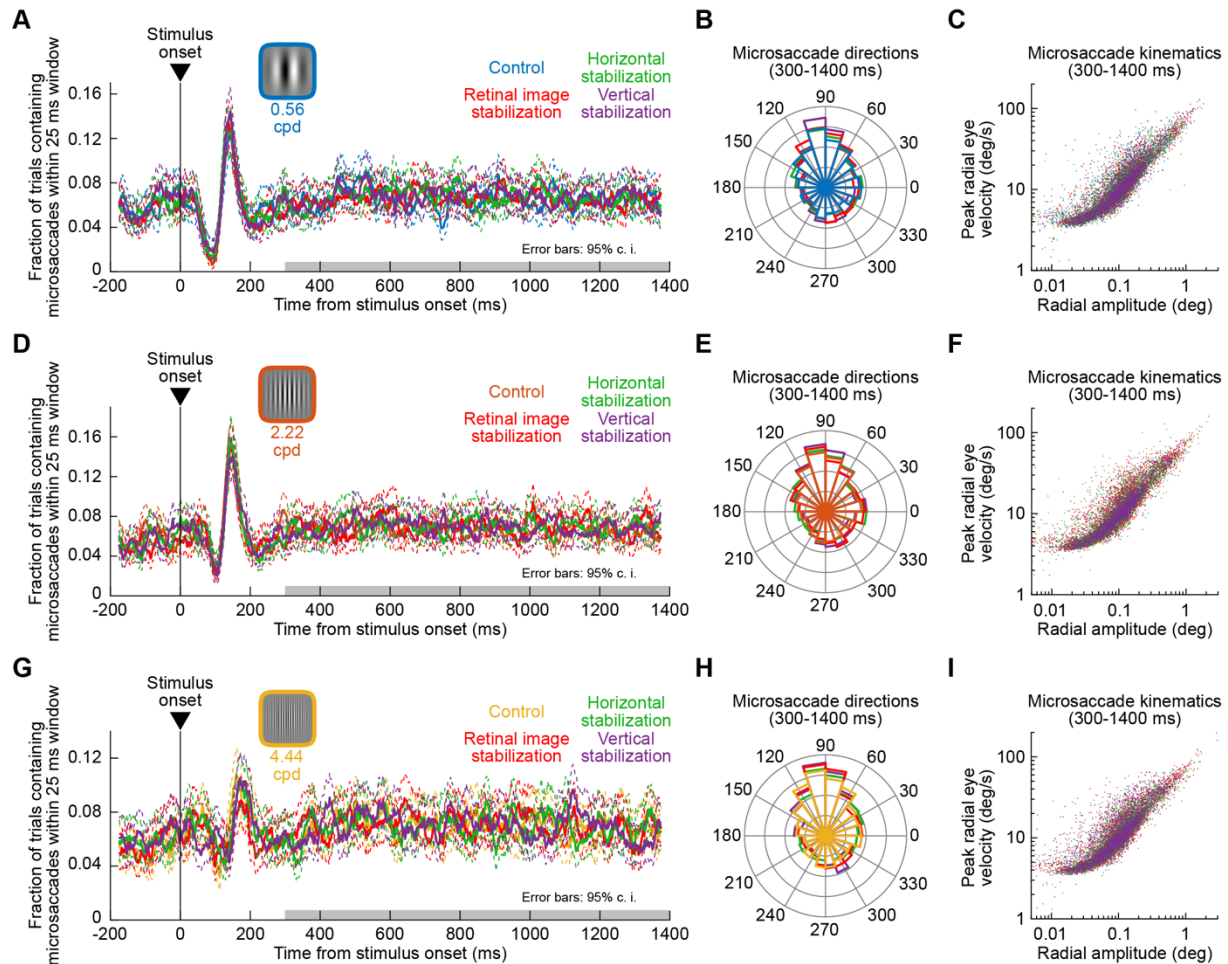

1070

1071

1072

1073

1074

1075

1076

1077

1078

1079

1080

1081

1082

1083

1084

1085

1086

1087

**Figure S2 Similarity of microsaccade characteristics between control trials and all retinal image stabilization trials.** (A) Microsaccade rate ( $\pm$  95% confidence intervals) as a function of time from stimulus onset from all trials with a 0.56 cpd grating (monkey P shown as an example). The different colors show the different conditions (control plus the three retinal image stabilization conditions of Fig. 1C-E). Initially, microsaccade rate was modulated by stimulus onset, as expected<sup>50,61,62</sup>, and was then stable. Critically, the modulations in microsaccades were similar across all of our experimental conditions (control versus the three types of retinal image stabilization). The gray bar denotes our analysis interval for exploring the influences of microsaccade-free ocular position drifts on SC neural activity. (B, C) Microsaccade directions (B) and kinematics (C) during sustained fixation were also unaltered by retinal image stabilization. (D-F) Same as A-C, but for the trials in which a 2.22 cpd grating was presented. (G-I) Same as A-C, but for 4.44 cpd trials. Monkey N showed the same results of no impact of retinal image stabilization on microsaccade characteristics. Note that in all of our neural analyses (except for Fig. S5), we excluded all microsaccades as well as pre- and post-movement intervals around them before taking any measurements (Methods). Our purpose in the current analysis was merely to demonstrate that the properties of microsaccades (like drifts in Fig. S1) were largely unaffected by the retinal image stabilization technique. This was due to the stability of the fixation spot on the display.



1088

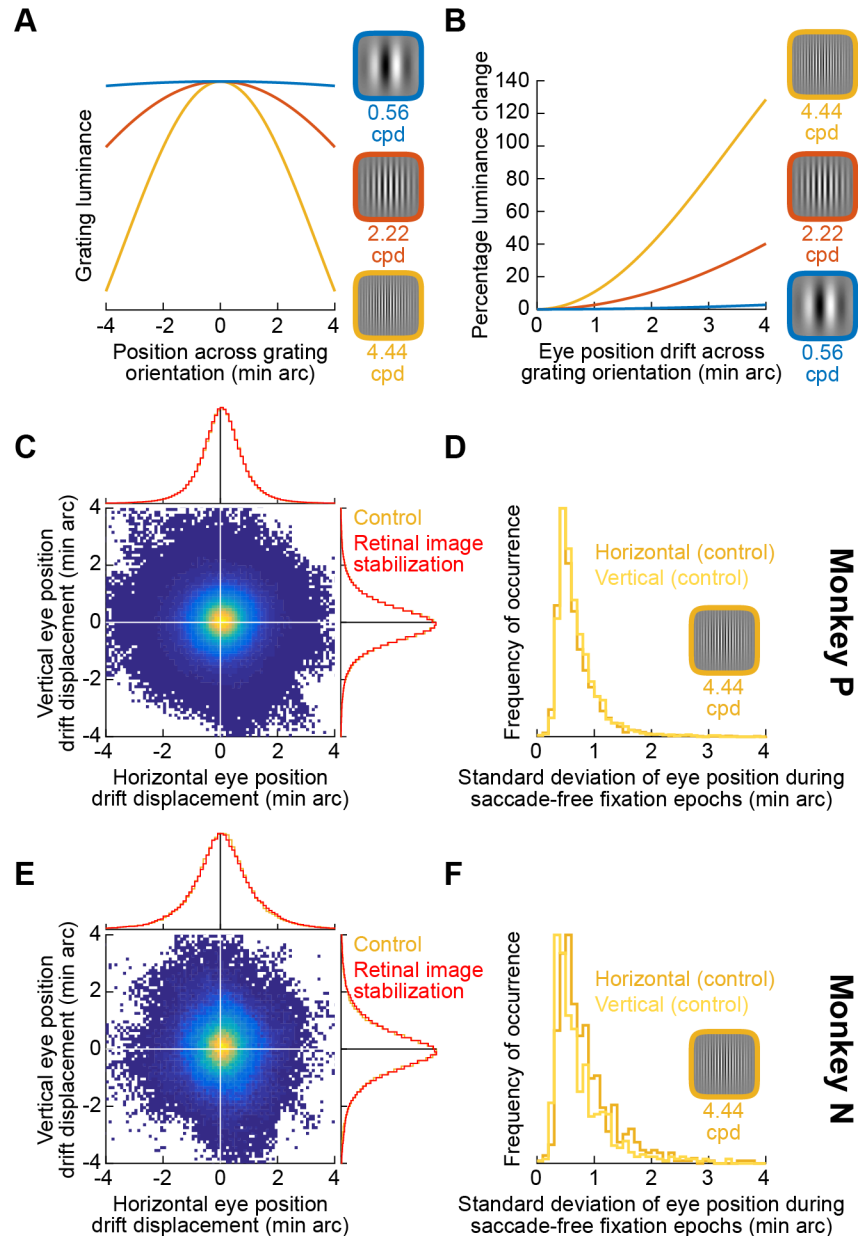

1089

1090

1091

1092

1093

1094

1095

1096

1097

1098

1099

1100

1101

1102

1103

1104

1105

1106

**Figure S3 Spatial scale of the image pattern displacements over SC neurons' visual RF's.** (A) Luminance profile of each of our three tested spatial frequencies as a function of position orthogonal to the grating orientation. (B) Ocular position drifts on the scale of 1 min arc are associated with the highest instantaneous change in luminance experienced at a given retinotopic location for the highest spatial frequency grating. (C) Two dimensional histogram of naturally-occurring displacements of eye position during microsaccade-free fixation. Within any microsaccade-free epoch, we measured the range of eye position deviation from mean position during the epoch (Methods). We did this for the control condition from one of our trial types (4.44 cpd trials), but the results were the same across all conditions (see Figs. S1, S2). The horizontal/vertical yellow histograms show the marginal distributions in each direction; the red histograms overlaid on top show the same distributions from the full retinal image stabilization condition for comparison. Microsaccade-free fixation epochs were associated with displacements on the order of 1 min arc, and were unchanged by our gaze-contingent manipulation (compare red and yellow histograms). (D) Variability estimate of microsaccade-free eye position drifts in monkey P (retinal image stabilization conditions yielded similar histograms). (E, F) Similar observations in monkey N. Natural fixation behavior in both monkeys was expected to cause predictable luminance modulations of image patterns over SC receptive fields, and such behavior was unchanged by our experimental manipulations (see Figs. S1, S2).

1107

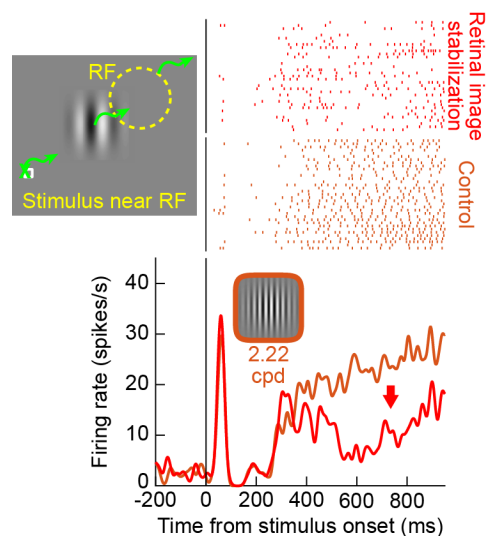

1108

1109

1110 **Figure S4 Validating the retinal image stabilization technique by forcing a grating position at a sub-optimal RF**  
1111 **position (away from RF center).** The schematic shows the experimental manipulation that we applied for this  
1112 neuron. We presented a grating stimulus displaced away from the preferred RF location indicated by the dashed  
1113 yellow circle. Therefore, the stimulus was near the RF, but at a sub-optimal position. Forcing this position during  
1114 retinal image stabilization significantly reduced the sustained response of the neuron. This is the complement of  
1115 the example neuron results shown in Fig. 2, in which forcing a stimulus at the best receptive field location  
1116 elevated the neural response relative to control.

1117

1118

1119

1120  
1121

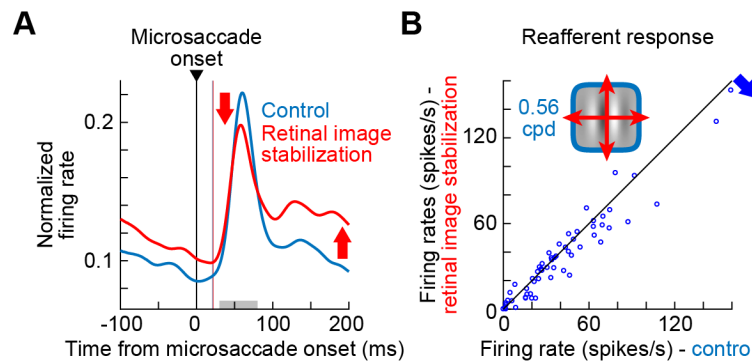

1122  
1123  
1124  
1125  
1126  
1127  
1128  
1129  
1130  
1131  
1132  
1133  
1134  
1135  
1136  
1137  
1138  
1139

**Figure S5 Validating the retinal image stabilization technique by exploring SC visual reafferent responses after microsaccades**<sup>25</sup>. **(A)** Across all neurons, we plotted normalized firing rate (as in Fig. 3A), but this time by aligning data to microsaccades during sustained fixation (as opposed to during microsaccade-free fixation, as in Fig. 3). We did this for presentations of a 0.56 cpd vertical grating. In control trials, there was an expected visual reafferent response immediately after microsaccades<sup>25</sup>. With retinal image stabilization, firing rate was elevated long before and long after microsaccades (consistent with our main results like in Figs. 2, 3). However, the reafferent response was reduced relative to control. This is because, even though microsaccades were fast relative to display updates, the retinal image stabilization technique still partially tracked these rapid eye movements. This resulted in subdued retinal-image motion caused by the microsaccades (relative to the control condition). Such a reduction in microsaccade-induced retinal-image motion is known to reduce the SC visual reafferent response<sup>25</sup>. **(B)** Across all neurons, we measured the microsaccade-induced reafferent response (during the gray interval on the x-axis in **A**) in the control and retinal image stabilization trials (Methods). There was a consistent reduction in the reafferent response during retinal image stabilization ( $p=0.0015$ ; 2-sample t-test;  $n=61$  neurons). Higher spatial frequency gratings had significantly weaker reafferent responses even during control trials<sup>25</sup>, making the effects of retinal image stabilization harder to observe.

1140

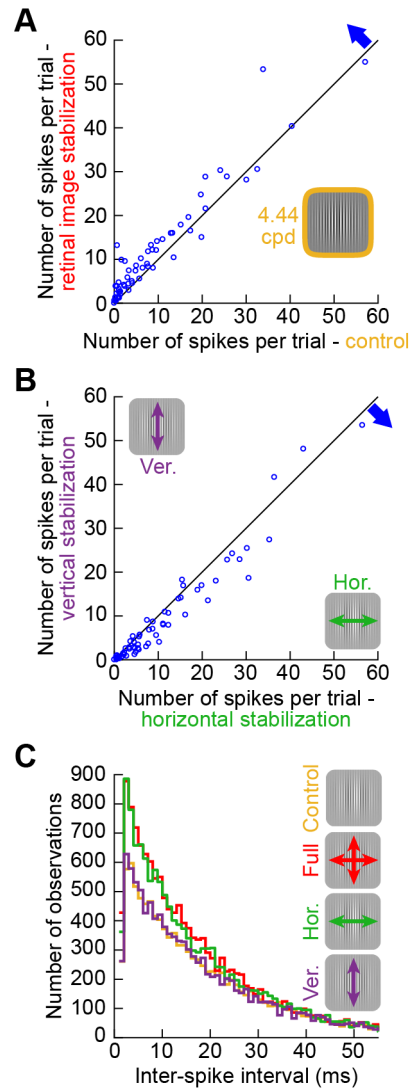

1141

1142

1143

1144

1145

1146

1147

1148

1149

1150

1151

1152

1153

1154

1155

1156

1157

1158

1159

**Figure S6 Individual neuron results from Fig. 3. (A)** We measured raw neural activity during sustained fixation (excluding peri-microsaccadic intervals; Methods) for the analyses of Fig. 3A, B. The x-axis counts the number of spikes per trial in control, and the y-axis counts the number of spikes per trial in retinal image stabilization. Note that given the length of our measurement interval (gray region on the x-axis in Fig. 3A), the shown values of spike counts are quantitatively equivalent to the approximate sustained firing rate of the neurons during the trials. Also, note that since microsaccade characteristics were unaltered by retinal image stabilization (Fig. S2), the shown differences in firing rates across the conditions could not be attributed to potentially different distributions of microsaccades across image stabilization manipulations. Rather, there was a consistent elevation of sustained neural activity (blue arrow) by retinal image stabilization ( $p=1.436 \times 10^{-5}$ ; 2-sample t-test;  $n=61$  neurons). This is consistent with the results of Fig. 3A, B. **(B)** We also compared the individual neuron spike counts across the horizontal and vertical retinal image stabilization conditions (as in Fig. 3C-F). The neurons consistently exhibited elevated activity for horizontal (orthogonal) rather than vertical retinal image stabilization ( $p=3.142 \times 10^{-6}$ ; 2-sample t-test;  $n=61$  neurons). **(C)** Across all neurons, inter-spike interval distributions reflected the results of Fig. 3: horizontal and full retinal image stabilization resulted in more SC activity than in control trials, but vertical retinal image stabilization did not. The inter-spike interval distributions also reveal that the SC spiking statistics (e.g. burstiness) were not significantly altered by retinal image stabilization.

1160

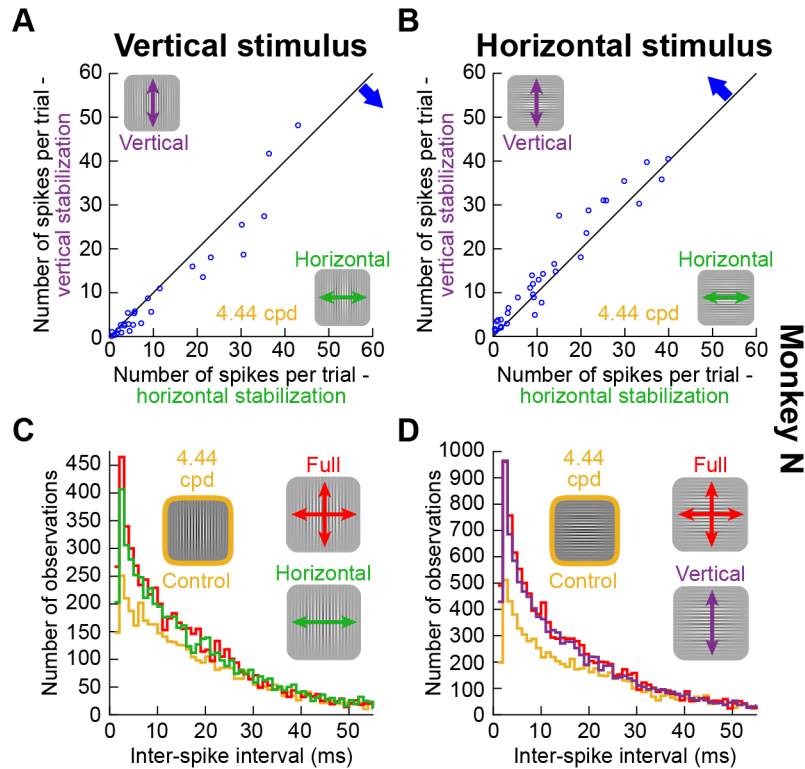

1161

1162

1163

1164

1165

1166

1167

1168

1169

1170

1171

1172

1173

**Figure S7 Individual neuron results with horizontal gratings showed similar results to the main experiments with vertical gratings. (A)** Same as Fig. S6B but from the monkey in which we also collected horizontal grating trials. The same results as in Fig. S6B were observed, as expected ( $p=0.0072$ ). **(B)** In the same animal, when we flipped the image pattern from vertical to horizontal, it was now vertical retinal image stabilization trials that resulted in elevated firing rates relative to horizontal retinal image stabilization trials ( $p=0.0026$ ; 2-sample t-test;  $n=35$  neurons). Therefore, it was the relative (orthogonal) relationship between the image pattern and the stabilization direction that mattered for the neurons, consistent with Figs. 4, S8. **(C, D)** Similar to Fig. S6C but for vertical **(C)** or horizontal **(D)** gratings in the same animal. Note that with horizontal gratings **(D)**, it was now vertical retinal image stabilization that resulted in indistinguishable results from full retinal image stabilization (instead of horizontal retinal image stabilization as in the case of vertical gratings in **C**).

1174  
1175  
1176

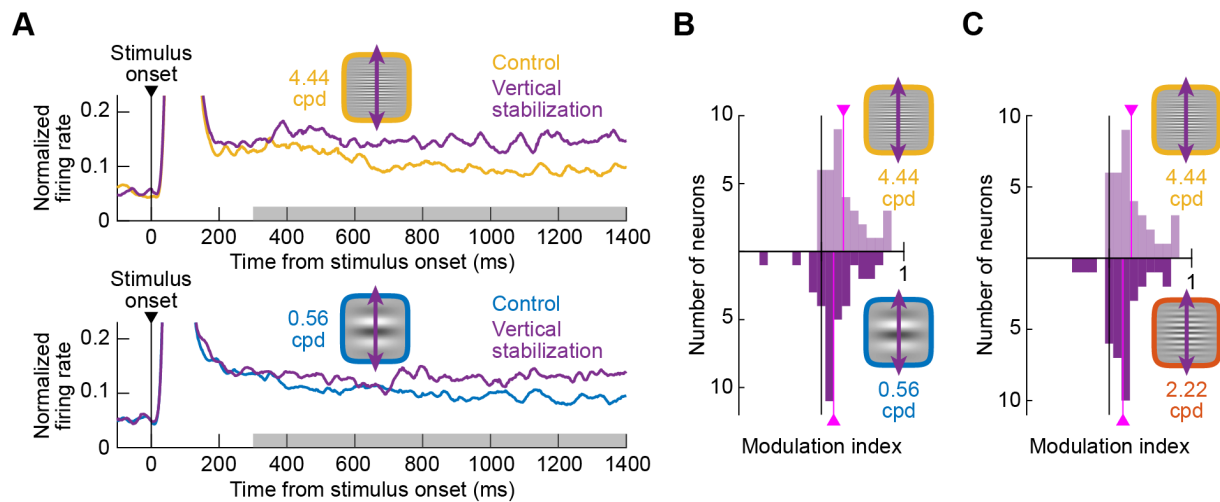

1177  
1178  
1179  
1180  
1181  
1182  
1183  
1184  
1185  
1186  
1187  
1188  
1189  
1190  
1191  
1192  
1193  
1194

**Figure S8 Dependence of neural modulation on spatial frequency even with horizontal gratings. (A)** Similar to Fig. 5A but for horizontal gratings and vertical retinal image stabilization (Fig. 4 showed that vertical retinal image stabilization with horizontal gratings was equivalent to horizontal retinal image stabilization with vertical gratings due to the orthogonal relationship between eye movements and image patterns in both cases). There was a higher modulation of neural activity by the retinal image stabilization technique for high (top) than low (bottom) spatial frequencies (compare each stabilization curve to its respective control curve), consistent with Fig. 5. **(B)** Similar to Fig. 5B but for horizontal gratings with vertical retinal image stabilization. The population average modulation indices were 26.84% and 14.94% for 4.44 cpd and 0.56 cpd gratings, respectively ( $p=0.0529$ ; 2-sample t-test;  $n=35$  neurons). **(C)** Similar to Fig. 5C but for horizontal gratings and vertical retinal image stabilization. Similar results to **B** were now obtained when comparing 4.44 cpd (26.84% average modulation index) to 2.22 cpd (16.76% average modulation index;  $p=0.0845$  comparing 4.44 cpd to 2.22 cpd modulations; 2-sample t-test;  $n=35$  neurons). Therefore, with both vertical (Fig. 5) and horizontal (this figure) gratings, the same dependence of neural activity on the relative spatial scale of image patterns and ocular position drifts was observed.



1195  
1196

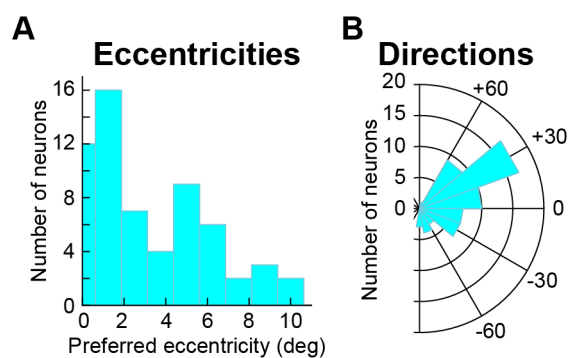

1197  
1198  
1199  
1200  
1201  
1202

**Figure S9 RF hotspot locations of the recorded neurons. (A)** Distribution of preferred eccentricities by our neurons. We sampled foveal and extrafoveal neurons. **(B)** Distribution of the directions of the RF hotspot locations relative to the horizontal meridian. We sampled both upper and lower visual field neurons.

1203  
1204  
1205

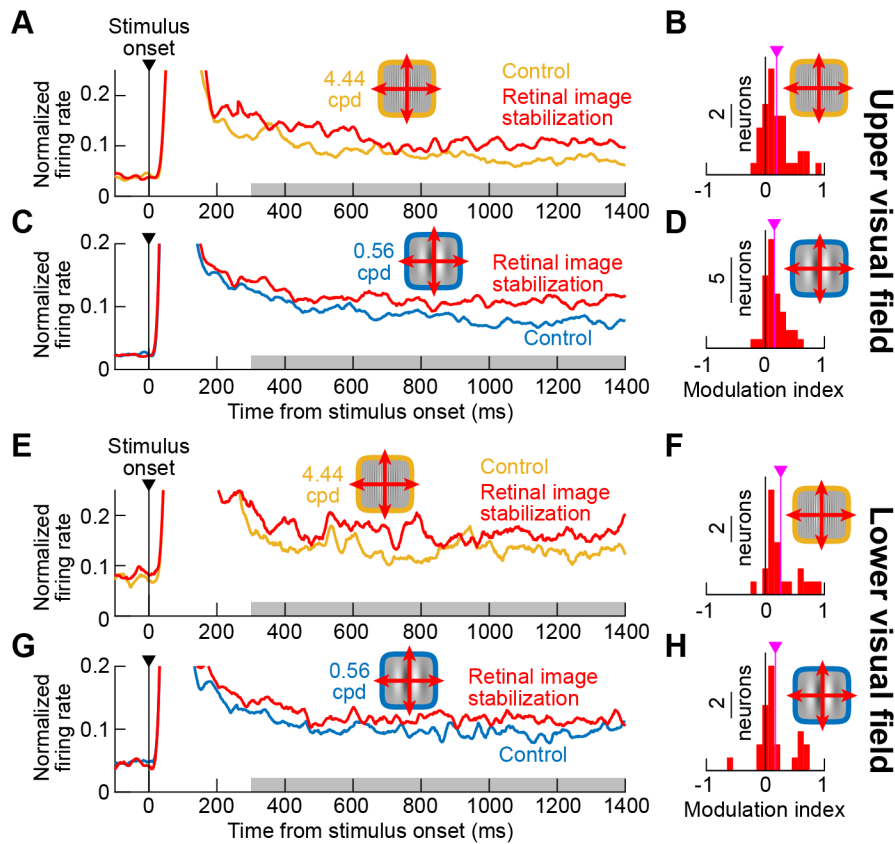

1206  
1207  
1208  
1209  
1210  
1211  
1212  
1213  
1214  
1215  
1216  
1217  
1218  
1219  
1220

**Figure S10 Sensitivity of both upper and lower visual field SC neurons to the visual-pattern consequences of ocular position drifts on the scale of 1 min arc amplitude. (A)** Normalized firing rates in control and retinal image stabilization from all neurons with RF hotspots occupying the upper visual field. A 4.44 cpd vertical grating was presented to the neurons. As in Fig. 3, neural activity was systematically elevated with retinal image stabilization. **(B)** Modulation indices for the individual neurons in **A**. There was a significant positive modulation across the population (average modulation of 19.2% across the population; pink vertical line;  $p=4.009 \times 10^{-5}$ ; 1-sample t-test;  $n=37$  neurons). **(C, D)** Same as **A, B** but for a low spatial frequency grating. The average modulation index was now 15.13% ( $p=1.649 \times 10^{-6}$ ; 1-sample t-test;  $n=37$  neurons). **(E-H)** Same as **A-D** but for lower visual field SC neurons, which we showed earlier (in the same animals) to have significantly larger RF's than upper visual field neurons<sup>9</sup>. There was still significant positive elevation of neural activity for these neurons ( $p=2.94 \times 10^{-4}$  for **F** and  $p=0.0134$  for **H**). Therefore, even SC neurons with relatively large RF's are still sensitive to the visual-pattern consequences of ocular position drifts.

1221

1222

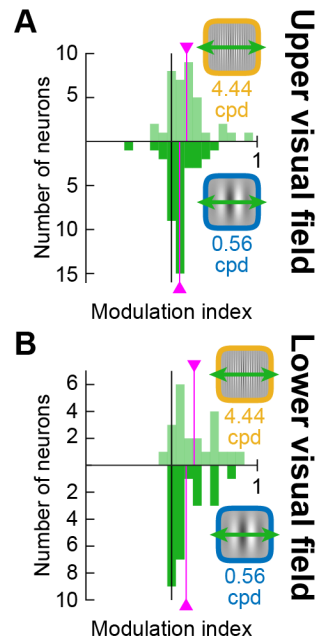

1223

1224

1225

1226

1227

1228

1229

1230

1231

1232

1233

1234

**Figure S11 Ocular position drifts cause stronger modulations with high spatial frequency patterns than low spatial frequency patterns in both upper and lower visual field SC neurons. (A)** Similar analyses to Fig. 5 but only for upper visual field neurons. The average modulation indices (pink vertical lines) for high and low spatial frequencies were 17.61% and 9.49%, respectively ( $p=0.0481$ ; 2-sample t-test comparing high to low populations;  $n=37$  neurons). **(B)** Same as **A** but for lower visual field neurons with larger RF's. The modulation indices were now 26.33% and 17.03% for high and low spatial frequencies, respectively ( $p=0.0066$ ; 2-sample t-test comparing high to low spatial frequency populations;  $n=24$  neurons). Similar results were obtained with full retinal image stabilization, as expected.
